# Supplementary material for: Implementation of an interconnected fault system in PSHA, example on the Levant fault
Source: Copernicus journal article supplement (doi:10.5194/nhess-2024-184), 2024-12-02
Supplement: Supplementary file [file nhess-2024-184-AC5-supplement.zip]

*Supplement of*

## **Implementation of an interconnected fault system in PSHA, example on the Levant fault**

Sarah El Kadri et al.

*Correspondence to:* Sarah El Kadri (sarahelkadry7@gmail.com)

Supplement

The following file includes three columns: longitude, latitude and slip rate of the sections constituting the Levant Fault System (in the same order as in Table 1 in the manuscript)

Coordinates\_sections\_Levant\_Fault\_System.txt
