# Supplementary material for: Implementation of an interconnected fault system in PSHA, example on the Levant fault
Source: Copernicus journal article supplement (doi:10.5194/nhess-2024-184), 2024-12-02
Supplement: Supplementary file [file nhess-2024-184-RC1-supplement.pdf]

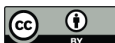

# 1 Implementation of an interconnected fault system in PSHA, 2 example on the Levant fault

3  
4 Sarah El Kadri<sup>1</sup>, Céline Beauval<sup>1</sup>, Marlène Brax<sup>2</sup>, Yann Klinger<sup>3</sup>

5  
6 <sup>1</sup>Univ. Grenoble Alpes, Univ. Savoie Mont Blanc, CNRS, IRD, Univ. Gustave Eiffel, ISTERre, 38000 Grenoble,  
7 France

8 <sup>2</sup>National Council for Scientific Research, CNRS-L, P.O. Box 16-5432, Achrafyeh, 1100-2040 Beirut, Lebanon

9 <sup>3</sup>Université de Paris Cité, Institut de physique du globe de Paris, CNRS, 1, rue Jussieu, Paris, France

10

11 Correspondence to: Sarah El Kadri (sarahelkadry7@gmail.com)

12

13

14

## 15 **Abstract.**

16

17 The Levant Fault System (LFS), a 1200 km-long left-lateral strike-slip fault connecting the Red Sea to the East  
18 Anatolian fault, is a major source of seismic hazard in **the Levant**. In this study, we focus on improving regional  
19 Probabilistic Seismic Hazard Assessment (PSHA) models by considering the interconnected nature of the LFS,  
20 which challenges the traditional approach of treating faults as isolated segments. We analyze the segmentation of  
21 the fault system and identify 43 sections with lengths varying from 5 to 39 km along the main and secondary  
22 strands. Applying the SHERIFS (Seismic Hazard and Earthquake Rate In Fault Systems) algorithm, we develop  
23 an interconnected fault model that allows for complex ruptures, making assumptions on which sections can break  
24 together. At first, using a maximum magnitude of 7.5 for the system and considering that ruptures cannot pass  
25 major discontinuities, we compare the classical and interconnected fault models through the seismic rates and  
26 associated hazard results. We show that the interconnected fault model leads on average to increased hazard along  
27 the secondary faults, and lower hazard along the main strand, with respect to the classical implementation. Next,  
28 we show that in order for the maximum magnitude earthquake to be more realistic (~7.9), the connectivity of the  
29 LFS fault system must be fully released. At a 475-year return period, hazard levels obtained at the PGA are above  
30 0.3g for all sites within ~20km of faults, with peak values around 0.5g along specific sections. At 0.2s spectral  
31 acceleration, hazard values exceed 0.8g along all fault segments. This study highlights the importance of  
32 incorporating complex fault interactions into seismic hazard models.

33

## 34 **1 Introduction**

35

36 The Levant Fault System (LFS) stretches approximately 1200 km from the Red Sea extensional fault system in  
37 the south to the East Anatolian fault system in the north, at the southern fault-rupture termination of the largest of  
38 the two 6 February 2023 Kharamanmaraş earthquakes (Zhang et al. 2023). The system is characterized by left-  
39 lateral strike-slip kinematics. Inside the Lebanese restraining bend, the fault splays into several branches: the  
40 Roum and Mount Lebanon faults to the west, Yammouneh, the main fault strand, in the center and the Rachaya  
41 and Serghaya faults to the east (Fig. 1a). The main strand accommodates most of the deformation with a mean  
42 slip rate ranging between 4 to 5 mm/yr (Daeron et al. 2004; Gomez et al. 2007a, b; Wechsler et al. 2018), whereas  
43 the secondary faults have slip rates estimated from 1 to 2 mm/yr (Gomez et al. 2003; Nemer and Meghraoui 2006,  
44 2008).

45

46 Probabilistic Seismic Hazard Assessment (PSHA) is required to produce seismic hazard maps essential for  
47 establishing building codes (e.g. Meletti et al. 2021 in Italy; Danciu et al. 2024 within Europe; Sesetyan et al.  
48 2018 in Turkey; or Wang et al. 2016 in Taiwan). In most of the source models built for PSHA, the conceptual  
49 representation of faults is rigid. Faults are made of a number of tectonically defined sections. Within a predefined

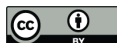

50 fault, ruptures can occur on individual sections or on a combination of sections. However, ruptures that would  
51 involve combination of sections from different predefined faults are not included in the model. The source models  
52 therefore usually include only a subset of the potential ruptures that may occur on the fault system.

53

54 [El Kadri et al. \(2023\)](#) published a seismic hazard model for Lebanon that integrates the major faults in the area in  
55 the classical way described above (Fig. 1a). Earthquake frequencies on these faults are inferred from a moment-  
56 balanced recurrence model relying on the geologic or geodetic mean slip rate evaluated for the fault. The source  
57 model also includes off-fault seismicity, through a catalog-based smoothed-seismicity model. [El Kadri et al.](#)  
58 [\(2023\)](#) follow the state-of-the-art standards in PSHA and deliver a distribution of seismic hazard levels for each  
59 site within Lebanon, which may be useful for future updates of the Lebanese building code. The present study  
60 aims to understand how the source model and eventually the hazard levels may change if an interconnected fault  
61 system is considered.

62

63 A number of earthquakes in the last 30 years have shown that ruptures can jump over some geometrical  
64 discontinuities, such as gaps or steps in the fault system, that were previously considered as major obstacles to  
65 rupture propagation. These jumps can result in larger magnitudes than anticipated (e.g., 2001 Mw 7.8 Kunlunshan  
66 earthquake in China, [Klinger et al. 2005](#); 2010 Mw 7.2 El Mayor-Cucapah earthquake in Mexico, [Fletcher et al.](#)  
67 [2014](#); 2016 Kaikōura Mw7.8 in New Zealand, [Klinger et al. 2018](#)). Therefore, several methods have been  
68 developed to take into account these complex ruptures into hazard models. In 2014, the Working Group on  
69 California Earthquake Probabilities (WGCEP) developed a new inversion-based methodology called the “Grand  
70 inversion”, to relax fault segmentation and incorporate multifault ruptures in the Uniform California Rupture  
71 Forecast (UCERF, [Field et al., 2014](#); [Page et al., 2014](#)). Subsequently, [Chartier et al. \(2017\)](#) implemented the  
72 SHERIFS (Seismic Hazard and Earthquake Rate In Fault Systems) algorithm, a method to relax fault segmentation  
73 which is simpler than the UCERF framework and that requires less input parameters. Additional algorithms were  
74 also developed, such as the integer-programming optimization by [Geist and ten Brink 2021](#), or the SUNFiSH  
75 approach by [Visini et al. \(2020\)](#). We focus on the SHERIFS algorithm, which has been applied on various crustal  
76 fault systems including the Corinth rift in Greece ([Chartier et al. 2017](#)), the North Anatolian Fault ([Chartier et al.](#)  
77 [2019](#)), the Eastern Betics in southeastern Spain ([Gomez Novell et al. 2020](#)), the southeastern Tibetan Plateau  
78 ([Cheng et al. 2021](#)), faults in central Italy, ([Moratto et al. 2023](#)), and the Pallatanga–Puna fault in Ecuador  
79 ([Harrichhausen et al., 2023](#)).

80

81 Our aim is to build interconnected fault models for the Levant fault system, applying the algorithm SHERIFS,  
82 and to estimate the associated hazard levels. We consider the faults described in [El Kadri et al. \(2023\)](#), but rather  
83 than including them separately in the hazard calculation, we first go down to the section scale and then evaluate  
84 all possible section combinations, for all magnitudes up to the maximum magnitude earthquake. Our aim is to  
85 understand how the iterative process in the SHERIFS algorithm builds the set of ruptures and associated  
86 occurrence rates, and distributes the moment budget over the ruptures with the constraint that earthquake  
87 frequencies follow a given distribution at the scale of the system. **We show that in order for the maximum**  
88 **magnitude earthquake to be realistic, the connectivity of the LFS fault system must be fully released.** Finally, we  
89 derive probabilistic seismic hazard levels by combining our preferred fault model with a set of ground-motion  
90 models. To test our source model against observations, we compare the earthquake forecast with the available  
91 earthquake catalog at a regional scale, and with earthquake sequences observed in paleoseismic trenches at a local  
92 scale.

93

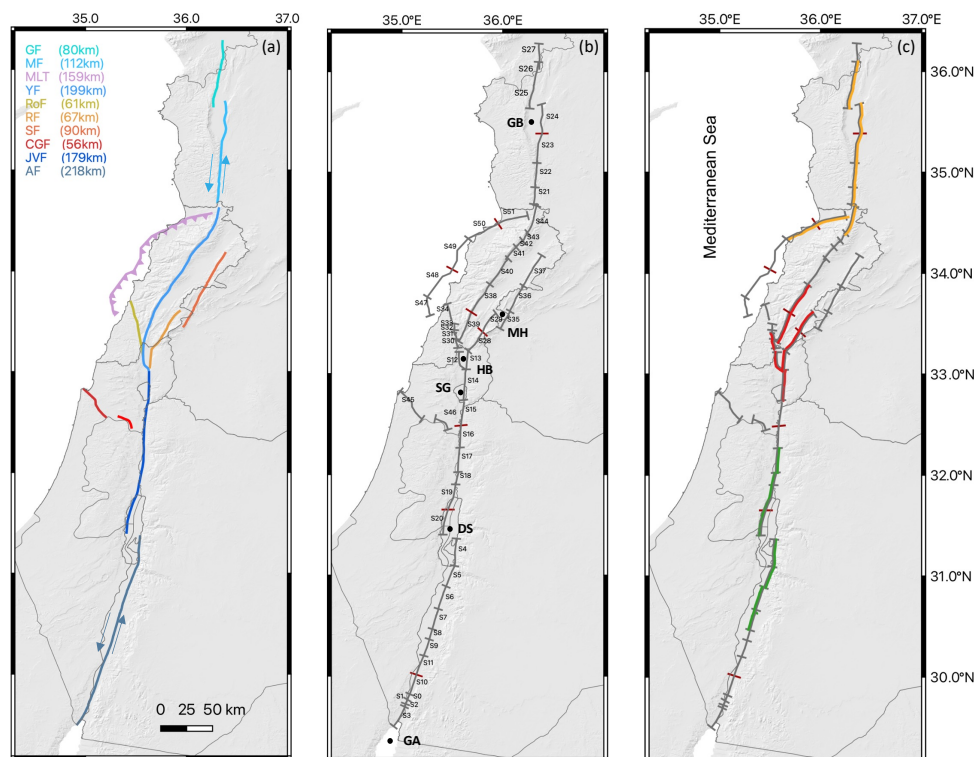

94  
95 **Figure 1 : The Levant Fault System. (a) Classical fault representation, the fault system is made of 10 main faults, GF:**  
96 **Ghab Fault, MF: Missyaf, MLT: Mount Lebanon thrust, YF: Yammouneh, RoF: Roum, RF: Rachaya, SF: Serghaya,**  
97 **CGF: Carmel-Gilboa, JVF: Jordan Valley, AF: Araba. (b) Detailed segmentation of the fault system, gray dash:**  
98 **tectonic discontinuities, red dash: arbitrary subdivision of sections required for homogenizing sections' length; GB:**  
99 **Ghab basin, MH: Mount Hermon, HB: Hula Basin, SG: Sea of Galilee, DS: Dead Sea, GA: Gulf of Aqaba. (c) Examples**  
100 **of possible complex ruptures that are not accounted for in the classical implementation of faults.**

101  
102 **2 The Levant Fault System**  
103

104 The Levant Fault System (LFS) has been the source of multiple significant earthquakes (Fig. 2), resulting in  
105 extensive destruction, surface faulting, and alterations to the landscape. Lefevre et al. (2018) has summarized the  
106 known history of major earthquakes along the southern fault section, between the Gulf of Aqaba and the Sea of  
107 Galilee, over the last ~1200 years, based on tectonic, paleoseismic, and historical data. Brax et al. (2019) analyzed  
108 the literature on historical events in-between latitudes 31.5° and 35.5° (approximately from the Dead Sea to the  
109 Ghab pull-apart). A number of destructive earthquakes occurred, including the 363 earthquake (M~7.3) that may  
110 have ruptured sections on the Araba fault or both on the Araba and Jordan Valley fault (Ferry et al. 2011; Klinger  
111 et al. 2015), the 551 event (M~7.3) that probably ruptured the off-shore Mount Lebanon thrust (Elias et al. 2007),  
112 or the 1202 earthquake (M~7.6) that ruptured the Yammouneh fault (Daeron et al. 2007) as well a section of the  
113 Jordan Valley fault (Jordan Gorge fault, Wechsler et al. 2018). North of Lebanon, strong earthquakes have also  
114 occurred along the Missyaf and Ghab faults, in particular the 1170 and 1157 earthquake sequences (Meghraoui et  
115 al. 2003; Sbeinati et al. 2010).  
116

117 To build the set of ruptures that may occur within the fault system, we need to move away from the regional-scale  
118 fault scheme of the LFS (Fig. 1a) and go down to the scale of the tectonic section. Several authors have studied  
119 the fault system and analyzed the segmentation. To the south, based on the location of major jogs and bends,  
120 Lefevre et al. (2018) proposed to split the Araba and Jordan Valley faults into 9 sections, up to the Hula Basin



121 segment south of Lebanon. [Ferry et al. 2011](#) studied the Jordan Valley section, based on satellite photographs,  
122 field investigations, and offset measurements. They mapped in detail the fault trace in-between the Dead Sea and  
123 the Sea of Galilée and identified six 15 to 30km-long right-stepping sections limited by relay zones. Within the  
124 Lebanese restraining bend, [Daeron \(2005\)](#) mapped the Yammouneh fault based on satellite images, aerial  
125 photographs and topographic maps. Additionally, the Roum, Rachaya and Serghaya fault traces were mapped by  
126 [Nemer and Meghraoui et al. \(2006, 2008\)](#) through detailed field work and aerial-photograph analysis. [Meghraoui](#)  
127 [\(2015\)](#) discussed the LFS fault trace and its segmentation, from the Gulf of Aqaba to the Amik Basin in Turkey,  
128 identifying the geometrical complexities (large step overs, pull-apart basins, restraining bends) that may act as  
129 barriers to earthquake ruptures.

130 We have built on these studies and reanalyzed satellite images along the whole fault system, looking for distinct  
131 steps and bends to define the sections. We have carefully analyzed the geological features and incorporated the  
132 relevant local paleoseismic information. The LFS mostly exhibits transtensional features, such as the significant  
133 pull-apart structures of the Gulf of Aqaba, the Dead Sea (gap ~14km), and the Ghab pull-apart (~11km). Another  
134 major discontinuity is the compressional jog that forms Mount Hermon and separates the Rachaya and Serghaya  
135 faults (Fig. 1b). At a smaller scale, the LFS comprises linear strands characterized by left-lateral offsets of drainage  
136 systems, right-stepping ruptures exhibiting pressure and shutter ridges, and minor pull-apart basins distributed  
137 along its length (such as the Qalaat Al Hosn pull-apart basin at the Syrian/Lebanese border, the Hula Basin, or the  
138 Yammouneh basin along the Yammouneh fault). We have also observed push-up zones indicating uplift along  
139 the Araba Fault. In total, we obtained 43 sections with lengths varying from 5 to 39 km (Fig. 1b, Table 1). Future  
140 ruptures may break along one or several sections. For example, a large earthquake could start in the Dead Sea pull  
141 apart, and propagate bilaterally both to the south on the Araba fault and to the north on the Jordan Valley fault  
142 (Fig. 1c, green). A large earthquake could also involve a rupture on the main strand of Yammouneh fault together  
143 with ruptures on the Roum and Serghaya fault branches in the same event (Fig. 1c, red). This complexity needs to  
144 be included in order to make more realistic fault models for PSHA. The level of connectivity in the system depends  
145 on which discontinuities are considered **firm barriers for earthquake ruptures**.

146 Some faults might be mechanically independent, while others involve faults that interact with each other. The  
147 degree of fault interaction is related to the dynamics of the earthquake rupture process ([Harris and Day 1993](#),  
148 [Gupta and Scholz 2000](#)). According to [Scholz and Gupta \(2000\)](#), the probability of an earthquake jumping from  
149 one fault to another increases with the degree of stress interactions between the faults. They introduced a criterion  
150 to estimate the degree of interaction based on separation and overlap of echelon normal faults, and recognized  
151 that the case of strike-slip faults is more complex. [Wesnousky \(2006\)](#) studied the mapped surface ruptures of 22  
152 historical strike-slip earthquakes to understand the role of geometrical discontinuities in the propagation of  
153 earthquake ruptures, and to evaluate the possibility for predicting the endpoints of future earthquake ruptures.  
154 Based on this dataset, he showed that ruptures do not propagate across fault steps larger than 3-4 km. However,  
155 subsequent earthquakes, such as the 2010  $M_w$  7.2 El Mayor–Cucapah earthquake in Mexico ([Fltecher et al. 2014](#))  
156 or the 2016  $M_w$  7.8 Kaikoura earthquake ([Hamling et al. 2017](#)), have challenged these conclusions and  
157 demonstrated that fault systems can undergo complex ruptures, involving numerous faults with various  
158 orientations and much larger stepovers. The Levant fault system includes significant discontinuities, with  
159 apparent step sizes exceeding 10 km (e.g. Ghab Basin, Mont Hermon, Dead Sea Basin). In the present work we  
160 test different levels of connectivity, allowing progressively larger jumps for ruptures. Nonetheless, it is important  
161 to keep in mind that within these discontinuities, substantial uncertainty exists regarding the presence of secondary  
162 faults connecting neighboring faults. Hence, these gaps might be smaller than they currently appear in map-view.

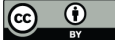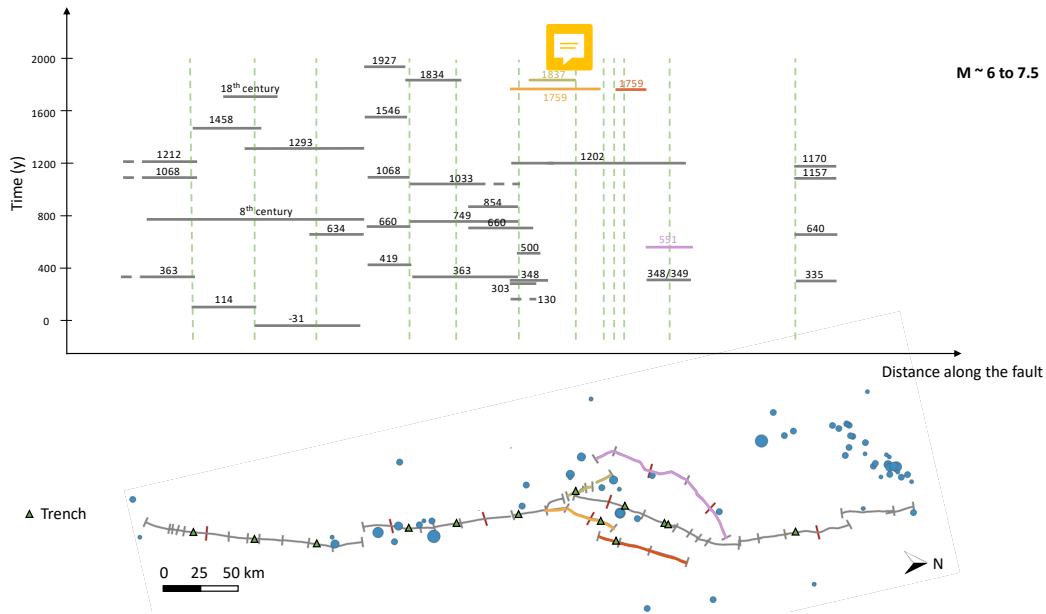

163  
164 **Figure 2 : Seismic activity in the region of the Levant Fault System. Top: paleoseismic events (horizontal bars, Lefevre**  
165 **et al. 2018) with extension of the ruptures inferred from observations in the trenches along the fault. Bottom: fault**  
166 **system with detailed segmentation, trenches (green triangles), instrumental events from global datasets (circles,**  
167 **magnitude larger or equal to 4.1, see Section 6), gray dash: tectonic discontinuities, red dash: arbitrary subdivision of**  
168 **sections.**

### 169 3 SHERIFS iterative process

170  
171 The SHERIFS algorithm (Chartier et al. 2017, 2019) aims at producing an interconnected fault model for PSHA  
172 by converting the moment rate stored within the fault system into earthquake rates along the faults. SHERIFS  
173 proposes a technique for distributing the moment rate budget over a number of earthquake ruptures within the  
174 system, with the constraint that earthquake rates follow a magnitude-frequency distribution at the level of the  
175 system. This magnitude-frequency distribution can be a Gutenberg-Richter distribution, or any other distribution  
176 (e.g. characteristic distribution). Ruptures can occur on sections alone or on combination of sections.

177  
178 SHERIFS' algorithm delivers a set of sections and sections' combinations (ruptures) with associated magnitudes  
179 and occurrence rates. In previous applications of SHERIFS, no information is provided on the obtained  
180 distribution of rupture magnitudes in space. Knowing how seismic rates are distributed in space is key to  
181 understanding the geographical pattern of hazard levels. In PSHA, at a site, ground-motion exceedance rates are  
182 calculated by multiplying rates of ruptures with the probabilities that the ruptures produce an exceedance of the  
183 ground-motion levels at the site. Ruptures close to the site will contribute more than ruptures away from the site.  
184 In the present study, we aim at understanding the exact distribution in magnitude and space of the ruptures, and  
185 its link with hazard levels.

186  
187 The algorithm requires as inputs:

- 188 - the set of fault sections' traces with extension at depth (dip angles and widths).
- 189 - the slip rates associated to every section,
- 190 - the geometrical rules for a section to be able to break with its neighboring sections: the maximum azimuth  
191 between two adjacent sections (here we use 75°) and the maximum distance between sections that a  
192 rupture may jump,

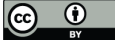

- 193 - an assumption on the shape of the magnitude-frequency distribution of the system (here we mainly use  
194 the Gutenberg-Richter distribution, but a characteristic distribution could also be considered),  
195 - the selection of a scaling relationship to associate magnitudes to rupture area, here we use Leonard 2014  
196 equations for interplate earthquakes,  
197 - an estimate for the maximum earthquake magnitude within the system.  
198

199 If the length of the sections is too heterogeneous, the algorithm subdivides the longest sections into shorter sections  
200 to homogenize sections' length. Within the Levant fault system, nine tectonic sections are arbitrarily subdivided  
201 into two sections, resulting in 52 sections in total within the fault system (Fig. 1b). Table 1 summarizes the  
202 characteristics of the sections considered. References for the mean slip rates can be found in El Kadri et al. (2023).  
203

204 Based on the hypothesis that earthquake rates follow a Gutenberg-Richter distribution, a probability density  
205 function (PDF) for the magnitude is built, corresponding to the relative contribution of the magnitude bins in  
206 terms of moment rates within the system (Fig. 3, see also Chartier et al. 2017, 2019). The exponential decrease of  
207 rates with increasing magnitudes is compensated by the huge increase in moment rate with magnitude. Using this  
208 pdf to sample magnitudes, large magnitudes are picked much more frequently than low magnitudes.  
209

210 The moment rate is distributed through an iterative process over magnitudes and associated sections or sections  
211 combinations. In a preliminary step, the algorithm establishes all possible ruptures, or section combinations, and  
212 associates earthquake magnitudes to these ruptures by applying the area-magnitude scaling relationship. Then, an  
213 iterative process starts (Figure 3) where at each iteration, the same amount of slip rate is spent (called 'dsr'). This  
214 process is as follows:

- 215 1) A magnitude is randomly picked in the pdf.  
216 2) A rupture is selected randomly from the pool of ruptures with areas matching the magnitude, according to the  
217 scaling relationship.  
218 3) The moment rate spent in the iteration is calculated based on the total area of the rupture, the shear modulus  
219 and the slip rate increment (Fig. 3).  
220 4) The seismic rate is eventually obtained dividing this moment rate by the moment corresponding to the  
221 magnitude.  
222

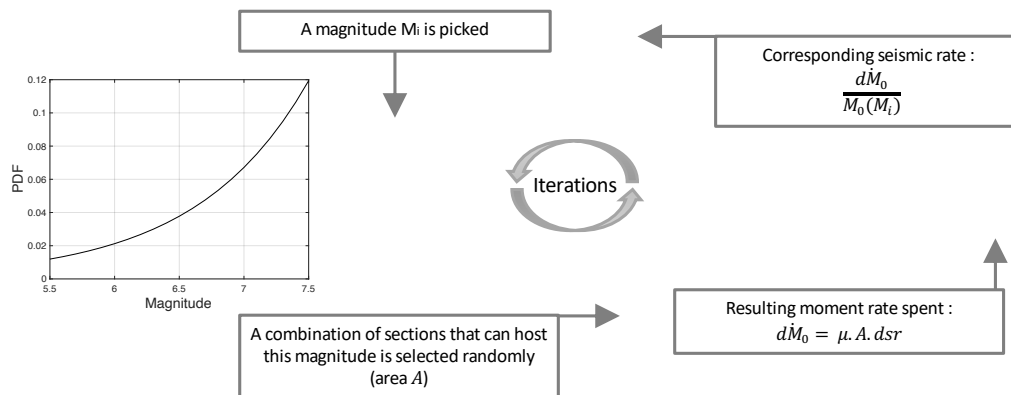

223  
224  
225 **Figure 3: Scheme illustrating the main steps of the SHERIFS iterative process where an amount of slip rate 'dsr'**  
226 **must be spent: 1) a magnitude  $M_i$  is picked; 2) a combination of one or several sections that can host this magnitude is**  
227 **selected; 3) the associated moment rate is estimated considering the slip rate increment, the area of the rupture  $A$  and**  
228 **the shear modulus  $\mu$ ; 4) the seismic rate is estimated dividing the moment rate by the moment  $M_0$  corresponding to**  
229 **this magnitude. The iterative process goes on until the sum of all section slip rates is exhausted. PDF to sample the**  
230 **magnitude established considering a Gutenberg-Richter with  $b$ -value=1 and  $M_{max}=7.5$ .**



231 Each time a section participates in a rupture, its slip rate budget decreases accordingly. When a section has no slip  
232 rate left, it cannot participate in any new ruptures. The iterative process goes on until the slip rate of all sections  
233 in the system is exhausted. Our tests show that the increment in slip rate must be very small to ensure a  
234 homogeneous distribution of seismic rates over the system (here we use 0.0001 mm/year).

235  
236 Large magnitudes are picked more frequently than low magnitudes, so the upper range of the system-level  
237 magnitude-frequency distribution is first built, then the remaining moment rate budget is spent over lower  
238 magnitudes until no budget is left. During the iterative process, at some point the rates of the largest magnitudes  
239 stabilize because some sections required to create these large ruptures have their slip rate exhausted. The shape of  
240 the magnitude-frequency distribution is anchored to the rates in the upper-magnitude range (see [Chartier et al.  
241 2017, 2019](#)). As will be shown in the application on the Levant fault system, understanding the role of these  
242 “anchor points” is key to fully grasp how the SHERIFS algorithm works and why the moment rate budget can  
243 never be spent entirely.

#### 244 245 **4 First application on the Levant fault system and comparison with the classical implementation** 246

247 We start with a test that enables the comparison with the classical implementation of faults (Figure 1a). We  
248 consider that ruptures cannot jump major discontinuities (Ghab pull-apart, Dead Sea pull-apart, Mount Hermon  
249 jog, gap between Roum and Mount Lebanon Fault), therefore we set the maximum jump to 10km. All sections  
250 can break with their neighbors, except those separated by these four gaps. We consider a maximum magnitude  
251 of 7.5 in the system, corresponding to the maximum magnitude earthquake in the classical implementation of  
252 faults, using the mean rupture area predicted by the [Leonard \(2014\)](#) scaling relationship (maximum length ~200km  
253 and width 18km, Yammouneh, Jordan Valley, and Araba faults, Fig. 1a).

#### 254 255 **4.1 Iterative process, the system magnitude-frequency distribution (MFD) and the anchor points** 256

257 Using a slip rate increment of 0.0001 mm/yr, in total ~1.9 million iterations are required to spend the system slip-  
258 rate budget. Figure 4 illustrates the process at three different steps. The first column displays, for the iteration  
259 n°1500, the moment rate already spent per magnitude interval (Fig. 4a, in blue), earthquake rates distributed within  
260 the system (Fig. 4b, in blue), and the fault sections that still have some budget to spend at this stage (in grey, all  
261 of them). The second column provides an update at iteration n°786300, with the moment rate spent and magnitude  
262 rates in orange. At that iteration, the rates in the upper magnitude range (i.e. 7.3-7.5) are fixed and the Gutenberg-  
263 Richter MFD of the system is anchored to these upper magnitude rates (black straight line). A number of sections  
264 have spent entirely their budget (Fig. 4f, in orange), others still have some budget (in grey), but no more large  
265 magnitudes (7.3-7.5) can be produced. In subsequent iterations, magnitudes continue to be sampled in the PDF  
266 and the remaining slip rate budget is spent until the seismic rates reach the system MFD (Fig. 4h, green crosses  
267 align with the black line). Any slip rate increment that leads to higher rates than predicted in a magnitude bin is  
268 discarded and considered aseismic slip. The third column displays results at the final iteration: the total moment  
269 rate spent (in green), the final magnitude-frequency distribution (in green), and the sections that have either  
270 consumed entirely their budget (orange and green), or have part of their slip budget converted into aseismic  
271 deformation (in grey). Overall, in this calculation, 9% of the slip rate budget was not spent on earthquakes.  
272 [Chartier et al. \(2017\)](#) call the unused slip rate ‘non-mainshock slip’. We prefer to simply state that part of the slip  
273 rate is not used and is considered aseismic slip. This aseismic slip may correspond to creep or afterslip of major  
274 events. [Chartier et al. \(2019\)](#) uses this unused slip rate as an indicator of whether the model is reasonable or not.  
275 Most studies consider that the slip rate deficit along the Levant fault system will be entirely released in earthquakes  
276 and that creep is negligible ([Gomez et al. 2003](#), [Daeron et al. 2004](#), [Gomez et al. 2007b](#), [Wechsler et al. 2018](#)), so  
277 9% is an acceptable amount of aseismic deformation.  
278

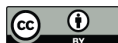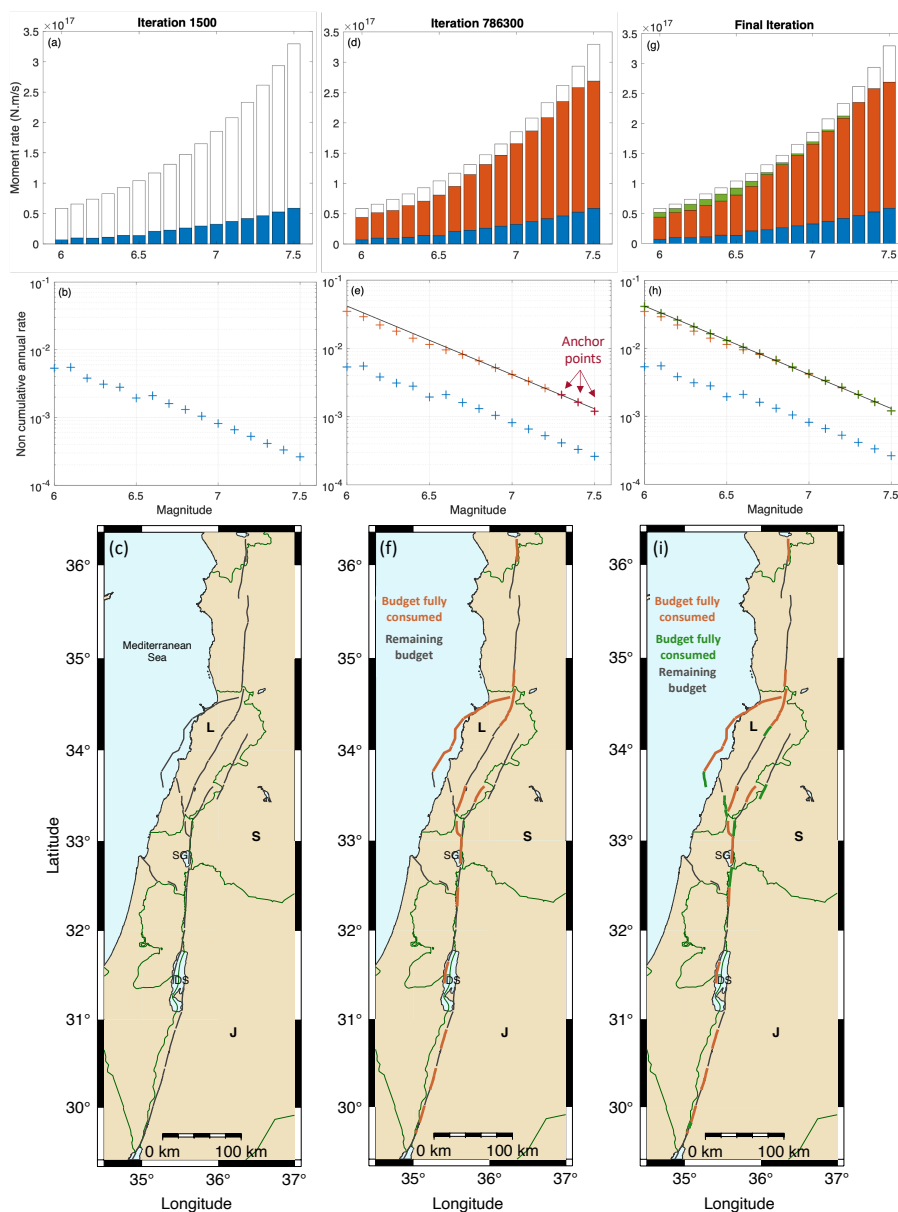

279

280

281 **Figure 3 : Illustration of the iterative process in SHERIFS, at 2 intermediary steps (1<sup>st</sup> and 2<sup>nd</sup> column) and final step**  
 282 **(3<sup>rd</sup> column). Maximum magnitude within the system 7.5 and maximum jump 10km. First row: in color, moment rate**  
 283 **spent per magnitude bin (white: total budget available). Second row: seismic rates distributed over the fault system.**  
 284 **Third row: fault sections that still have some budget to spent (gray), sections with slip budget exhausted (orange, then**  
 285 **green), in (i) : end of the process, sections with part of the slip budget converted into aseismic slip (grey). See the text.**  
 286 **L: Lebanon, S:Syria, J:Jordan, SG: Sea of Galilee, DS: Dead Sea**

287

288

289





#### 290 4.2 The distribution of magnitude rates in space

291  
292 As in any probabilistic seismic hazard study, we need to know where the seismic rates are distributed in space and  
293 in magnitude. With SHERIFS, because the moment rate (or slip rate) is distributed in a huge number of ruptures  
294 (combination of sections), it is not straightforward to display this information. One solution is to estimate the  
295 participation rate of the sections to given magnitude earthquakes. Figure 5 displays the annual rates of occurrence  
296 obtained for its participation to magnitude  $M_w$ 6,  $M_w$ 6.5 and  $M_w$ 7.5 ruptures, respectively, for every section of the  
297 fault system. Rates are normalized by the section area in order to be comparable throughout the system. We run  
298 several times the SHERIFS algorithm and the distribution of the magnitude rates in space results very similar.  
299 Figure 5 shows that whatever the magnitude, the distribution of earthquake ruptures along the system are not  
300 homogeneous and rates vary strongly between sections. For magnitudes 6 and 6.5, the highest rates (orange to  
301 red) are obtained on the southern half of the Yammouneh fault, southern sections of Jordan Valley fault, and  
302 northern sections of Araba Fault. For magnitudes 7.5, we observe the opposite, the highest rates are obtained along  
303 the northern part of the JVF, and along the northern sections of the Yammouneh fault. Owing to the shape of the  
304 probability density function, SHERIFS algorithm is more likely to pick magnitudes in the upper magnitude range  
305 than in the lower magnitude range. Sections that participate in large magnitude ruptures have less slip rate  
306 available for moderate magnitude ruptures. Note that because for now ruptures are not allowed to jump gaps larger  
307 than 10km, the sections north of Ghab pull-apart, as well as on the Sergaya fault, cannot participate to a magnitude  
308 7.5 (in grey in Fig. 5c).

309

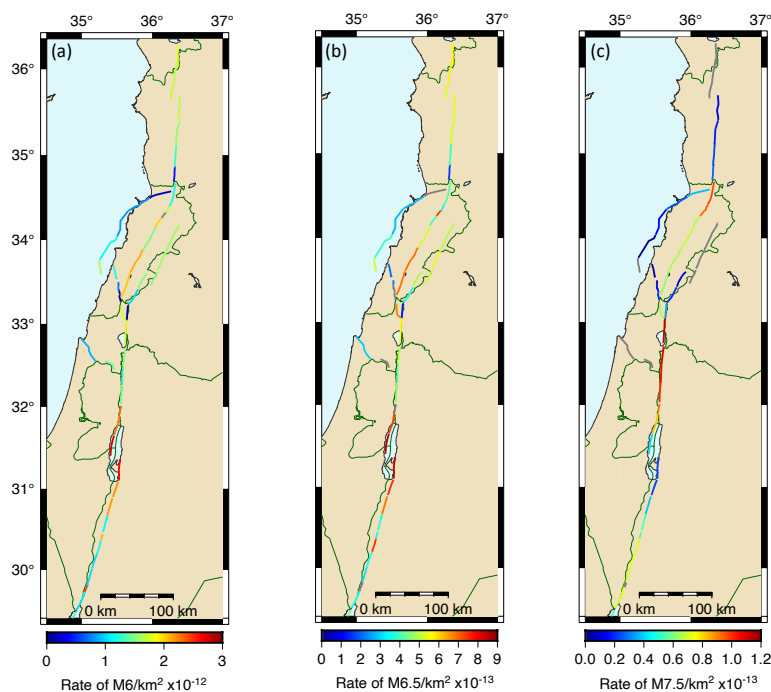

310

311 **Figure 5 : Annual rates of earthquakes for magnitudes  $M_w$  6, 6.5, and 7.5, normalized per square kilometer for each**  
312 **segment of the fault system.**

#### 313 4.3 Earthquake rates forecast: interconnected versus classical approach

314

315 The moment budget available for earthquakes relies on the slip rates of fault sections and is the same as in the  
316 classical implementation of faults. However, the distribution of this moment budget over earthquake ruptures is  
317 not similar, as the interconnected fault model includes much more rupture possibilities between sections than the



318 classical implementation. In the interconnected fault model (with maximum jump 10km), ruptures can combine  
319 sections from both the Missyaf and Yammouneh faults, or sections from both the Missyaf and Mount Lebanon  
320 fault. Also, sections that belong to the Roum fault can break with sections on Yammouneh, Rachaya, and/or the  
321 Jordan Valley faults. In figure 4a, we compare the fault-system MFD obtained with SHERIFS with the fault-  
322 system MFD that corresponds to the classical implementation (i.e. the sum of individual Gutenberg-Richter  
323 MFDs). We observe that earthquake rates corresponding to the interconnected model are slightly lower in the  
324 moderate magnitude range, and slightly higher in the upper magnitude range close to  $M_{max}$ . This can be understood  
325 by highlighting the sections that can participate in the maximum magnitude  $M_{max}$  ruptures (Figs. 4b and 4c, in  
326 blue): more sections can participate in a magnitude 7.5 earthquake in the interconnected model than in the  
327 classical (rigid) implementation. There is more moment rate available for the upper-magnitude range, as the model  
328 is moment-balanced there is slightly less moment rate available for earthquakes in the moderate-magnitude range.  
329

330 When performing the comparison at the level of the named faults defined in Fig. 1 (e.g., Yammouneh, Rachaya,  
331 etc...), the differences obtained between the classical and the interconnected approach are much larger. Figure 7  
332 displays the magnitude-frequency distributions in the classical implementation of faults, superimposed to the  
333 participation rates obtained in the interconnected fault model. The sections involved are the same, but in the case  
334 of the interconnected fault model, the sections can participate in larger ruptures that include sections from  
335 neighboring faults. For example, sections of the Rachaya fault are limited to magnitude 7.1 ruptures in the classical  
336 implementation; whereas in the interconnected model they can participate in ruptures up to 7.5. As the moment  
337 rate budget is the same, the rates in the moderate magnitude range are lower in the interconnected fault model,  
338 with respect to the classical fault model.



339

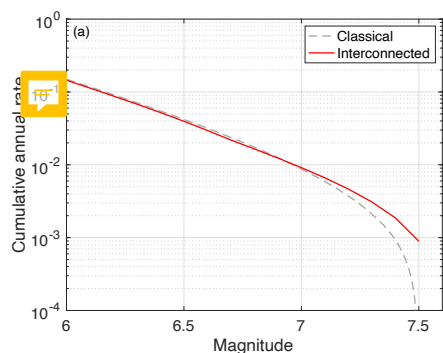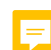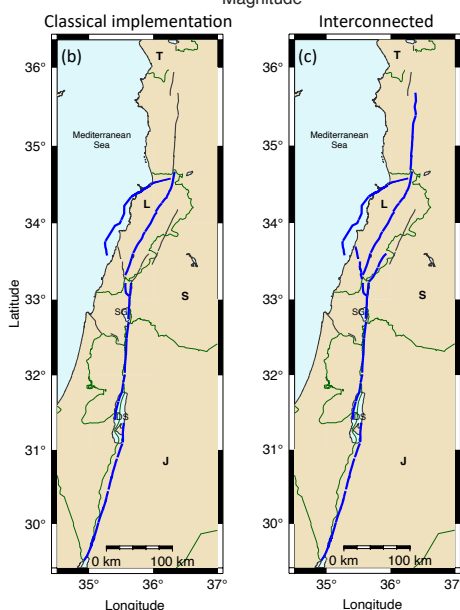

340  
341  
342  
343  
344  
345  
346  
347

Figure 4 : Comparison between the classical implementation of faults, and the interconnected model. (a) Magnitude-frequency distributions at the scale of the whole fault system (assumption  $M_{\max}$  7.5), both distributions are moment-balanced using the fault slip rate. (b) Classical and (c) Interconnected fault model, in blue sections that can participate in a maximum magnitude  $M_{\max}$  7.5 rupture. More sections can participate in the interconnected fault model, so more moment rate is available for the upper magnitude range.

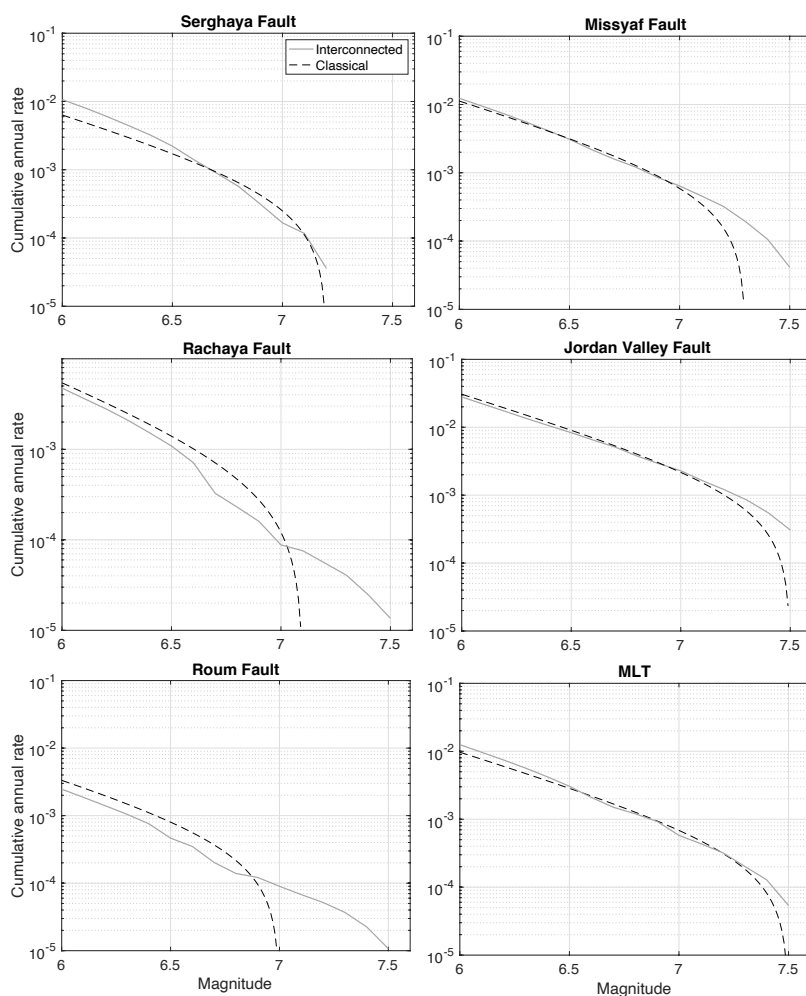

348  
349 **Figure 7: Magnitude-frequency distributions for 6 example faults in the classical implementation (dashed lines),**  
350 **compared to participation rates obtained with SHERIFS (solid lines). Assumption  $M_{max}$  7.5. Interconnected model**  
351 **with maximum jump 10km. Participation rates: seismic rates associated to the segments are summed, some ruptures**  
352 **may involve sections that do not belong to the fault.**

353

#### 354 4.4 Hazard levels at 475 years – interconnected versus classical approach

355

356 To compare the classical and interconnected fault models in terms of hazard level, we ran two hazard calculations  
357 that combine the same set of ground-motion models respectively with the two different fault models. Two seismic  
358 hazard maps for the PGA at 475 years return period were produced (Fig. 8, generic rock site with  $V_{S30} = 760$  m/s).  
359 Following El Kadri et al. (2023), we include three ground-motion models equally weighted in a logic tree: Chiou  
360 and Youngs (2014), Akkar et al. (2014) and Kotha et al. (2020). The three models predict ground motions for  
361 shallow crustal earthquakes. Hazard calculations are performed with the Openquake engine (Pagani et al. 2014).  
362 We truncated the gaussian distribution at 3 standard deviations above the mean.

363

364 Both seismic hazard maps display Peak Ground Accelerations (PGAs) of 0.7-0.8g for a mean return period of 475  
365 years, but there are major differences in the hazard patterns obtained. In the classical implementation, the hazard  
366 is much higher (up to 0.7-0.8g) along the more rapid main strand than on the slower secondary faults (up to 0.4-



367 0.5g); whereas in the interconnected fault model, secondary faults may pose a comparable threat as the main  
368 strand. Overall, using the interconnected fault model, the hazard levels decrease along the main strand (from  
369 ~0.7-0.8 to ~0.5-0.6g), but increase along the secondary faults (from ~0.4 to ~0.5g), with respect to the classical  
370 implementation. In the interconnected model, hazard levels are no longer uniform within a fault, they vary  
371 significantly depending on the location of the site along the fault. They are highest along the southern part of the  
372 Yammouneh fault, as well as along the southern part of JVF, and northern part of Araba fault, corresponding to  
373 the sections with the highest rates in the moderate magnitude range (Figs. 5a and 5b, rates for magnitudes 6 and  
374 6.5). These higher hazard levels can be explained by the observation that moderate magnitudes often control  
375 hazard estimates at 475 years return period, when a Gutenberg-Richter model is used (e.g., El Kadri et al. 2023).  
376

377 For sites above the dipping Mount Lebanon Thrust, the interconnected fault model delivers hazard levels much  
378 higher along the southern part than in the north. The northern sections of Mount Lebanon Thrust are involved in  
379 more large magnitude ruptures than the southern sections, as they may break with segments from the Missyaf and  
380 Yammouneh faults. Southern sections cannot rupture with the Roum fault when the maximum jump is set to 10km  
381 and as a consequence, annual rates of moderate magnitudes are higher in the south resulting in higher hazard.

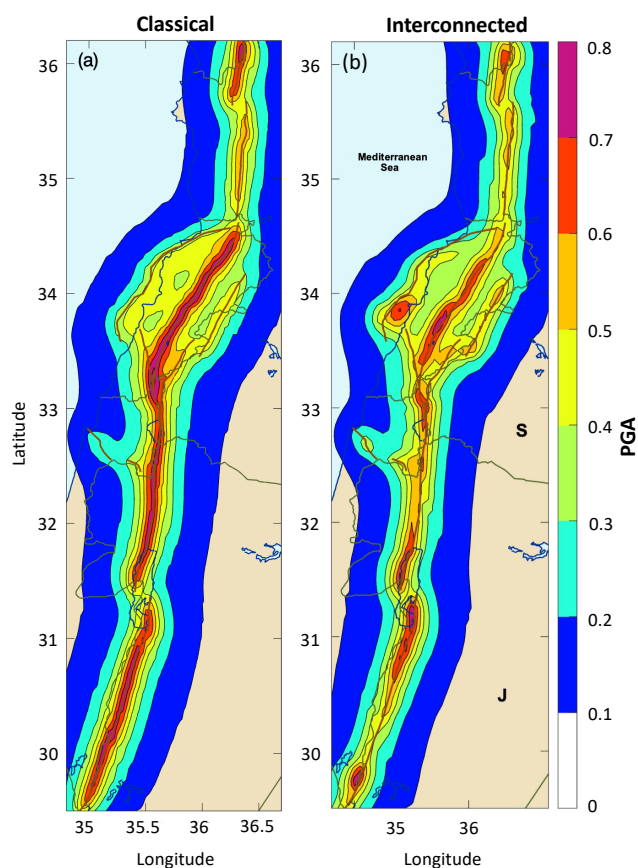

382  
383 Figure 8 : Seismic hazard maps, PGAs at a 475 year return period (a) based on the classical implementation of faults,  
384 assuming that the maximum magnitude is  $M_{\max}$  7.5, (b) based on the interconnected model assuming  $M_{\max}$  7.5  
385 (maximum jump 10km, ruptures cannot jump major discontinuities). Generic rock site condition ( $V_{S30}=760$  m/s).  
386

387 5 A realistic fault model for the Levant fault system: full connectivity and  $M_{\max}$  7.9  
388



389 Reviewing other major strike-slip fault systems worldwide and the largest earthquakes they have generated (e.g.  
390 the Mw 7.8 1906 earthquake on the San Andreas, [Yeats et al. 1997](#); 2002 Mw 7.9 Earthquake along the Denali  
391 fault in Alaska, [Eberhart-Phillips et al. 2003](#); or the recent 2023 Mw 7.8 earthquake on the East Anatolian fault,  
392 [Zhang et al. 2023](#)), we believe magnitudes larger than 7.5 could occur along the Levant fault system. Thus, the  
393 source model for PSHA must include the possibility for large events, and therefore we test two potential maximum  
394 magnitudes: 7.9 and 8.1.

### 396 5.1 Test with $M_{\max}$ 7.9 and need for full connectivity

397  
398 To begin with, we run the algorithm with a maximum magnitude of 7.9, keeping all other parameters as in Section  
399 4. In particular, we start with a maximum jump of 10km. Sections on the Araba, Serghaya and Ghab faults cannot  
400 participate in a magnitude 7.9 rupture (Fig. 9a, sections in blue). Many sections are left with more than 50% of  
401 the slip rate not used (Fig. 9b, sections in orange). Sixty-four percent of the total slip rate is not spent on  
402 earthquakes (Fig. 9b). Such a high percentage of aseismic slip is not realistic in the light of what is known for the  
403 LFS. Next, we increase the maximum jump for ruptures from 10 to 12 km and run a new calculation so that  
404 ruptures can jump over the Ghab pull-apart as well as over Mount Hermon jog (Fig. 9c). All sections can now  
405 participate in a magnitude 7.9 earthquake, except for sections on the Araba fault. Only a few end-fault segments  
406 are left with more than half of the slip rate unused (Fig. 9d). In this run, twenty one percent of the total slip rate is  
407 not spent on earthquakes.

408  
409 Lastly, we increase the maximum jump to 18km so that the fault system is now entirely connected and ruptures  
410 can jump over all major discontinuities, including the gap between Roum and Mount Lebanon fault (Fig. 9e). All  
411 sections can participate in a magnitude 7.9 rupture. In this case, the interconnected fault model uses 95% of the  
412 slip rate budget, with 5% of the budget considered aseismic slip. This low fraction of aseismic slip is compatible  
413 with the studies showing that this fault system is nearly entirely coupled (e.g., [Wechsler et al. 2018](#), [al Tarazi et](#)  
414 [al. 2011](#)).

415  
416 Figure 10 displays the distribution of the moment rate spent in earthquakes as well as the fault-system MFDs  
417 obtained for the three different runs. Increasing the connectivity from a 10km maximum jump (light grey  
418 histogram) to a 12km maximum jump (dark grey histogram) or a 18km maximum jump with full connectivity  
419 (black histogram), the moment rate spent in earthquakes increases. When full connectivity is applied, the moment  
420 rate spent (dark histogram) is close to the total moment rate stored in the system (white histogram). When ruptures  
421 cannot jump over major discontinuities (Fig. 9a), only a fraction of the sections can participate in the maximum  
422 magnitude earthquakes. Thus, rates for earthquakes in the upper magnitude range are low (Fig. 10b, light grey  
423 crosses). These rates constitute the anchor points of the system MFD and thus limit the rates over the whole system  
424 (light grey dash-dotted curve). Increasing connectivity, more sections can participate in the maximum magnitude  
425 earthquakes, the system MFD is anchored on higher rates, and more moment rate can be spent into earthquakes  
426 within the whole magnitude range (dashed dark grey curve for 12km jump, dark solid curve for full connectivity,  
427 Fig. 10b).

### 429 5.2 Selection of the most realistic model among models tested

430  
431 In our last test, we kept a fault system entirely connected and increased the maximum magnitude to 8.1. Figure  
432 11 summarizes the tests achieved and displays the system MFD resulting from:

- 433 - a run with  $M_{\max}$  7.5 and major discontinuities acting as barriers (Section 4)
- 434 - a run with  $M_{\max}$  7.9 and a fully connected system,
- 435 - a run with  $M_{\max}$  8.1 and a fully connected system.

436  
437 The moment rate available for earthquakes within the system is constant (proportional to the slip rates and  
438 section surfaces), therefore when increasing the maximum magnitude of the Gutenberg-Richter model, the rates  
439 of moderate magnitude earthquakes decrease. Earthquakes with magnitude close to 8.0 are believed to have



440 possibly occurred in the past along the Levant fault system (e.g. Lu et al. 2020). We believe that a 5%  
441 percentage of aseismic deformation is more realistic than 9 or 11%, for the Levant fault system. Therefore, the  
442 fully interconnected fault model with maximum magnitude earthquake 7.9 is our preferred model. Next, we  
443 calculate the hazard levels obtained when combining this fault model with a set of ground-motion models.  
444

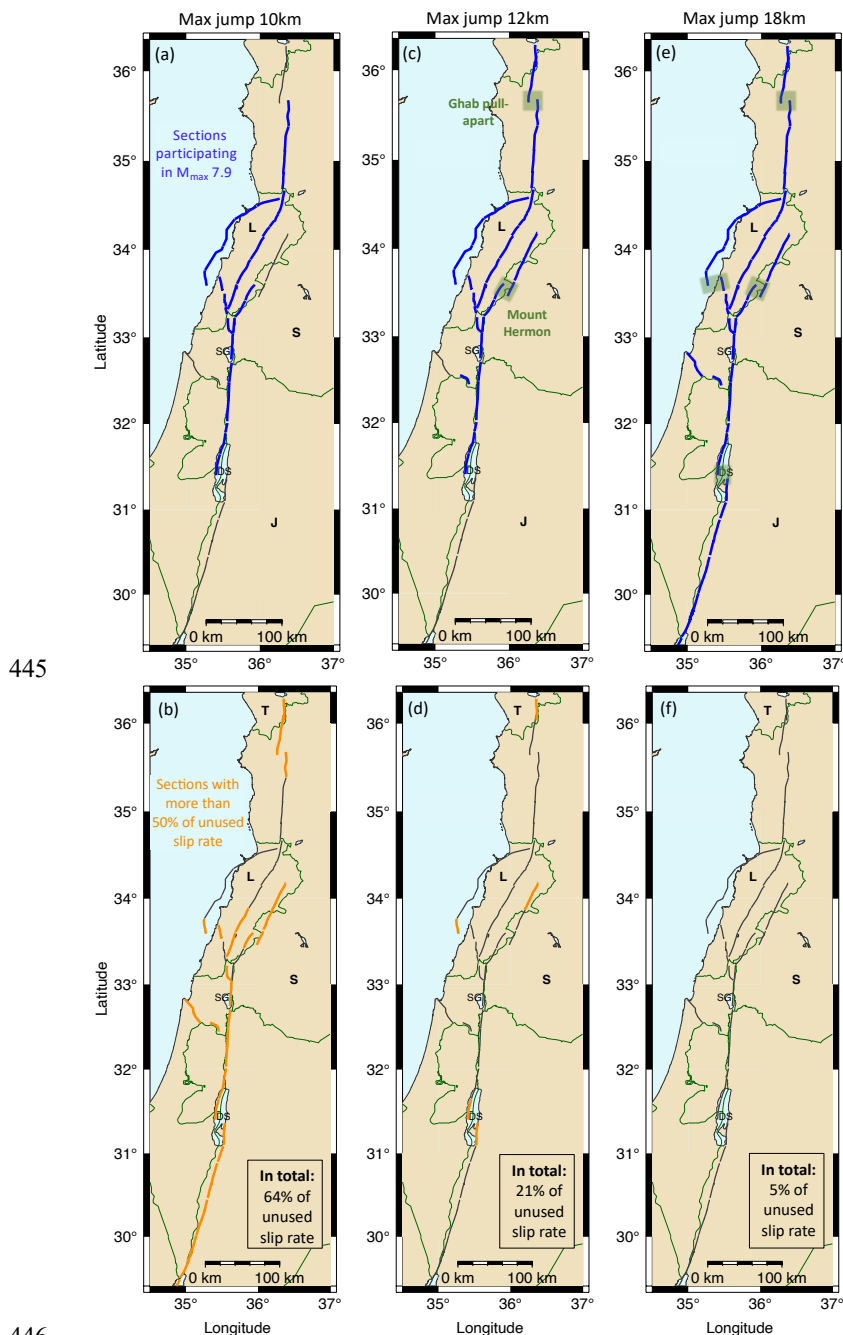



447 **Figure 9: Increasing the connectivity in a fault model with  $M_{max}$  7.9. 1<sup>st</sup> column: jump up to 10km allowed, 2<sup>nd</sup>**  
 448 **column: jump up to 12km (ruptures can pass through Ghab pull apart and Mount Hermon jog), 3<sup>rd</sup> column: jump up**  
 449 **to 18km (entirely connected, ruptures can pass all major discontinuities). 1<sup>st</sup> row, blue: sections that can participate**  
 450 **in a  $M_{max}$  7.9 rupture, green: discontinuities that ruptures can pass. 2<sup>nd</sup> row, orange: sections left with more than**  
 451 **50% unused slip rate at the end of the run; the percentage of the slip rate not used at the scale of the fault system is**  
 452 **indicated.**

453

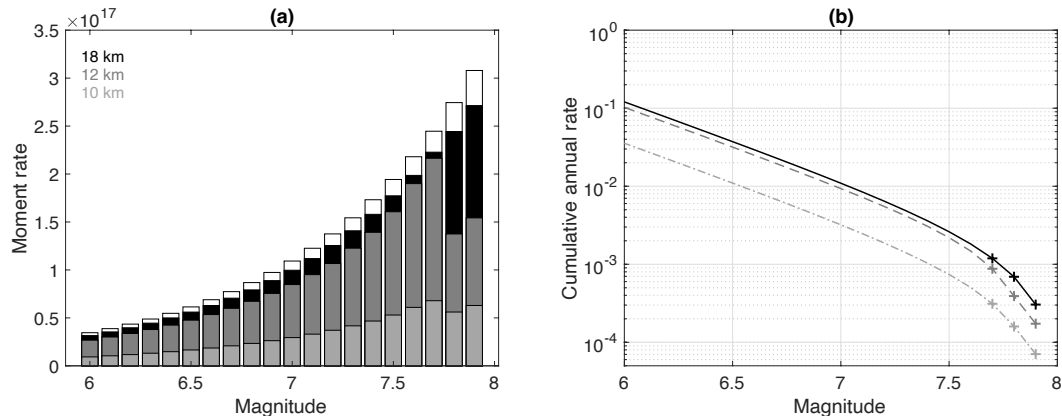

454 **Figure 10: Increasing the connectivity in a fault model with  $M_{max}$  7.9, (a) distribution of the moment rate spent per**  
 455 **magnitude bin and (b) magnitude-frequency distribution, at the scale of the fault system. Light grey: ruptures cannot**  
 456 **jump more than 10km (Fig. 9a), dark grey: maximum jump for ruptures of 12km (Fig. 9c), black: maximum jump**  
 457 **18km, system is entirely connected (Fig. 9e).**

458

459

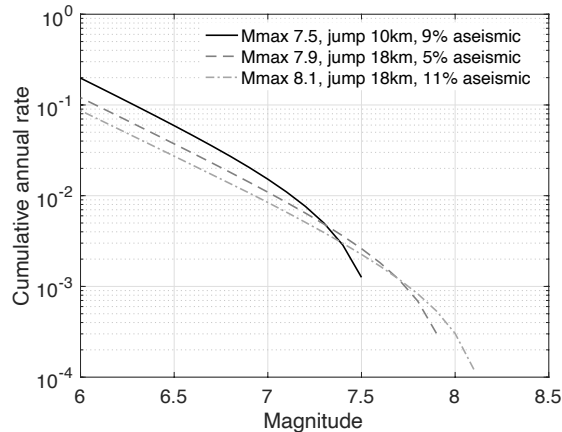

460 **Figure 11: (a) Magnitude-frequency distribution obtained at the scale of the fault system, for three runs of SHERIFs.**  
 461 **Solid curve: assumption  $M_{max}$  7.5 and the major discontinuities act as barriers (Section 4). Dashed curve: assumption**  
 462  **$M_{max}$  7.9 and the system is entirely connected. Dashed-dot curve: assumption  $M_{max}$  8.1 and the system is entirely**  
 463 **connected. All models are moment-balanced, but the percentage of unused slip rate varies with the model**  
 464 **(respectively 9, 5 and 11%). Our preferred model is the fully interconnected model with  $M_{max}$  7.9 (see the text).**

466 **5.3 Hazard levels associated to our preferred fault model ( $M_{max}$  7.9 and full connectivity)**

467

468 Figure 12 displays the seismic hazard map obtained for the PGA and 0.2s spectral acceleration at 475 years return  
 469 period, by combining the  $M_{max}$  7.9 interconnected model with the ground-motion logic tree. As expected, the PGA  
 470 levels at 475 years return period are lower than obtained from the model with  $M_{max}$  7.5 (Fig. 8b), due to the  
 471 decrease of seismic rates in the moderate magnitude range (Fig. 11). At all sites within ~20km of the faults, PGA





472 values are above 0.3g, except on the northern part of Mount Lebanon fault inland. PGA values are larger than  
473 0.4g at most sites along the Ghab fault, Yammounch fault, the southern part of Mount Lebanon fault, the central  
474 part of Jordan Valley fault, and the Araba fault. Peak values above 0.5g are found mainly at sites along the southern  
475 sections of the Mount Lebanon fault, as well as to the north and to the south of the Araba fault. These peak values  
476 are likely due to higher rates of moderate magnitudes on these sections. Figure 12b displays spectral accelerations  
477 at 0.2s for the same return period 475 years.  
478

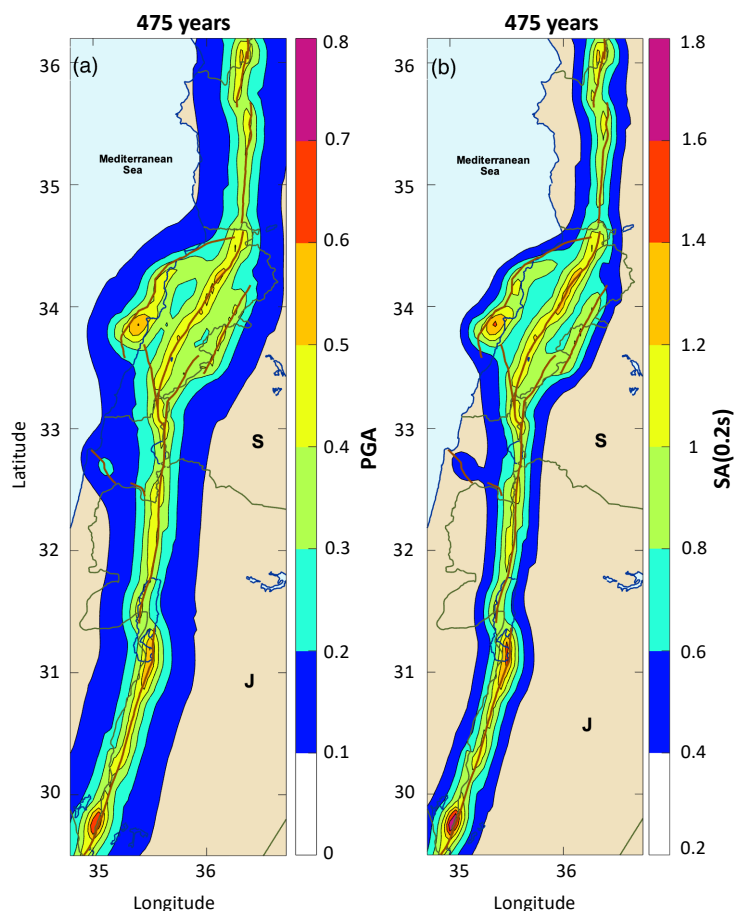

479  
480 **Figure 12:** Seismic hazard map for a return period of 475 years based on a fully interconnected model assuming  $M_{max}$   
481 7.9. (a) at the PGA, (b) at 0.2s spectral acceleration. Generic rock site condition ( $V_{S30}=760$  m/s).  
482

#### 483 **6 Comparison of the modeled rates with the available observations**

484  
485 The fault model built for PSHA is made of earthquake ruptures and associated annual rates of occurrence. The  
486 earthquake forecast delivers a magnitude-frequency distribution at the scale of the fault system that follows a  
487 given shape. Both the earthquake catalog of the region and the available paleoseismic data were not used to derive  
488 the model; these observations can be compared with the earthquake forecast.  
489

490  
491



## 492 6.1 Observed earthquake rates for the region

493

494 Our model forecasts earthquakes on the fault system and at this stage no background seismicity is added. We build  
495 an earthquake catalog for the region keeping in mind that only the largest magnitudes may be associated with the  
496 main faults.

497

498 [Brax et al. \(2019\)](#) published a catalog of historical earthquakes for the Lebanese region between latitudes 31.5°  
499 and 35.5°. For every earthquake, the authors evaluated the information available in historical accounts, as well as  
500 the macroseismic intensity datasets produced and their interpretations in terms of epicentral location and  
501 magnitude estimate. Earthquakes whose existence is attested, but for which it was not possible to find a solution  
502 relying on clearly identified historical sources and intensity data have not been included (see Electronic  
503 Supplement 2 in [Brax et al. 2019](#)). For the period before 1900, we used the [Brax et al. \(2019\)](#) catalog,  
504 supplemented south of latitude 31.5° and north of latitude 35.5° by earthquake solutions from the EMME  
505 earthquake catalog ([Zare et al. 2014](#)), resulting in 23 earthquakes in total (Fig. 2 and Fig. 13).

506

507 We used global instrumental catalogs over the period 1900 to 2020, within the spatial window 34.5° to 37° in  
508 longitude, and 29° to 37° in latitude. We consider the ISC-GEM (International Seismological Center - Global  
509 Earthquake Model, Version 10, [Storchak et al., 2015](#)), GCMT (Global Centroid Moment Tensors, [Ekström et al.,  
510 2012](#)) and ISC (International Seismological Centre, [Storchak et al. 2020](#)) catalogs. From the ISC catalog we  
511 include only earthquakes with an ISC location and a magnitude  $M_s$  or  $m_b$  (that we convert into  $M_w$  applying  
512 equations from [Lolli et al. 2014](#)). We obtain 35 instrumental events with magnitude  $M_w$  ranging from 4.1 to 6.1.

513

514 Figure 13 displays the earthquake catalog obtained: destructive earthquakes with magnitudes larger or equal to  
515 ~6.5 occurred regularly in the last 2000 years in the region. The last one within this spatial window struck southern  
516 Lebanon in 1837. Magnitudes of historical earthquakes bear large uncertainties (see e.g. [Brax et al. 2019](#)),  
517 nonetheless such high magnitude levels are confirmed by the analysis of numerous paleoseismic trenches available  
518 along the LFS. The distribution of magnitudes in the interval 5.5-6.5 is particularly irregular over time. In the  
519 instrumental period starting in 1900, the largest earthquake in the spatial window is the  $M_w$ 6.1 1927 Jericho  
520 earthquake (magnitude from the ISC-GEM catalog). The instrumental catalog also bears significant uncertainties  
521 as only global data have been included. [Brax et al. \(2019\)](#) did include earthquake solutions from local networks  
522 in the region. Different magnitude types are provided and to merge the datasets, several conversions between  
523 magnitudes are required (see Electronic Supplement 3 in [Brax et al. 2019](#)). The dispersion observed in the  
524 magnitude comparisons is very large in most cases. In this study, we prefer to use only global catalogs and ensure  
525 a certain level of homogeneity in the magnitude estimate, at the cost of a higher magnitude of completeness.

526

527 Earthquake rates are estimated considering a magnitude interval of 0.5. Based on cumulative number of events  
528 versus time plots, we evaluate that magnitudes larger or equal to 7.1 are complete since 363, magnitudes larger or  
529 equal to 6.6 since 1170, magnitudes larger or equal to 4.6 since 1981, and larger or equal to 4.1 since 2003 (Fig.  
530 13). For the magnitude interval 5.6-6.6, there are too few earthquakes to estimate the period of completeness. We  
531 estimate periods from the ISC-GEM catalog at the global scale: magnitudes larger or equal to 5.6 are considered  
532 complete since 1965, and magnitudes larger or equal to 6.1 since 1925. Additionally, to get a rough estimation of  
533 the impact of magnitude uncertainties on rates, we generated 100 synthetic catalogs from the original one,  
534 sampling the magnitude of each earthquake from a gaussian distribution centered on the original magnitude with  
535 a standard deviation of 0.3 for historical events and 0.1 for instrumental events.

536

537 Cumulative annual rates are displayed in Fig. 14, superimposed to the modeled magnitude-frequency distribution  
538 for the fault system (our preferred model with  $M_{max}$  7.9 in orange). The rate estimates from an analysis of  
539 paleoseismic trenches are also superimposed ([Lefevre et al. 2018](#)). We assume that all events with magnitude  
540 larger or equal to 7.1 and most events with magnitude larger or equal to 6.1 occurred on a fault. The model is  
541 roughly consistent with observations for magnitudes larger or equal to 6.6, but forecasts more events than observed  
542 for magnitudes larger or equal to 6.1. Up to now we have tested only the Gutenberg-Richter exponential  
543 distribution for the system. To know if a characteristic [Youngs and Coppersmith \(1985\)](#) distribution would be  
544 more compatible with observed rates, we run again the algorithm with an  $M_{max}$  7.9, full connectivity, and a



545 characteristic earthquake model. The model obtained is roughly consistent for magnitudes larger or equal to 7.1,  
546 but strongly underpredicts rates for magnitudes larger or equal to 6.6 and 6.1. Fourteen percent of the total slip  
547 rate is not used and considered aseismic, which is not realistic.  
548

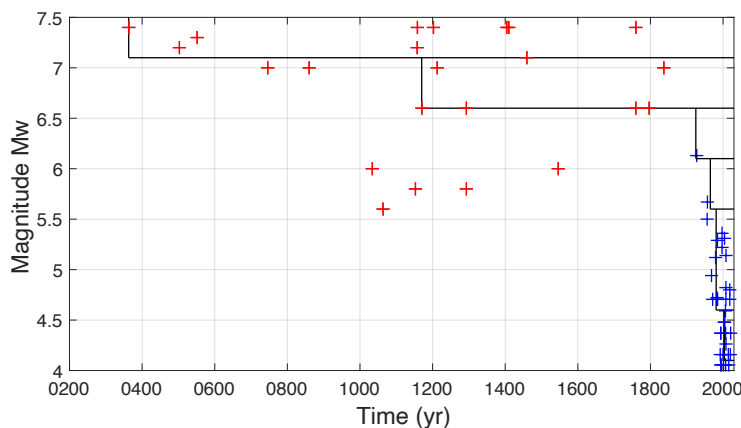

549  
550 **Figure 13: Earthquake catalog used (same as in Fig. 2), magnitude versus time, historical (red) and instrumental**  
551 **(blue) events. Periods of completeness per magnitude interval are indicated (straight lines).**

552

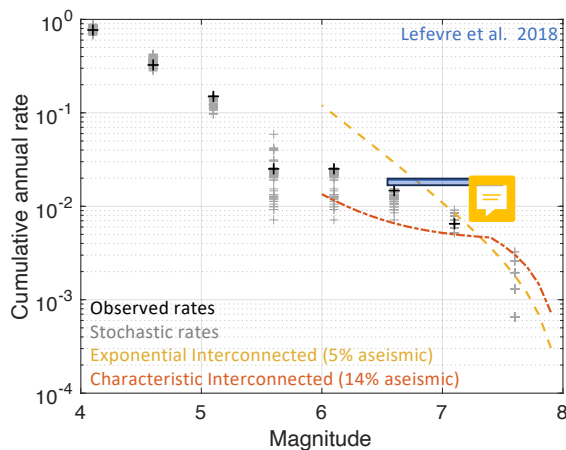

553  
554 **Figure 14: Magnitude-frequency distributions compared to observed rates. Black crosses: observed annual rates**  
555 **estimated from the regional earthquake catalog, grey crosses: annual rates from synthetic earthquake catalogs to**  
556 **account for uncertainties on magnitudes. Orange dashed curve: fault system MFDs, assumption Gutenberg-Richter,**  
557 **model with  $M_{\max}$  7.9. Red dashed curve: fault system MFDs, assumption characteristic model Youngs and**  
558 **Coppersmith with  $M_{\max}$  7.9.**  
559

## 560 6.2 Earthquake rates from paleoseismic trenches

561

562 Paleoseismic studies provide information on earthquakes that occurred before historical times and thus extend the  
563 observation time window available. Several trenches have been excavated along the Levant Fault System. They  
564 deliver key data on the size and on the timing of the earthquakes that ruptured the fault at the trench site. From  
565 the fault model built with SHERIFS, we can extract the set of ruptures passing through the trench site, with  
566 associated rates, and compare this forecast with the paleoseismic data.  
567



568 [Daeron et al. \(2007\)](#) analyzed in detail a trench across the Yammouneh basin. They identified ten to thirteen paleo-  
569 events extending back more than ~12kyr, and they were able to provide reliable age bounds for half of these  
570 events. In the historical period, the most recent event is the 1202 destructive earthquake (magnitude estimate 7–  
571 7.8, according to [Ambraseys and Jackson, 1998](#)). They also identified an earthquake that occurred between 30  
572 B.C. and A.D. 469. We consider these two earthquakes in the historical period, as well as 6 prehistoric earthquakes  
573 that occurred in a period extending over ~5600 years starting ~12kyrs ago (record considered complete over the  
574 period, events S7 to S12, see [Daeron et al. 2007](#)). Estimates for six inter-event times are thus available. To take  
575 into account the uncertainty on the age of these events, we generate synthetic earthquake sequences by sampling  
576 the age of each event within a uniform PDF defined by the minimum and maximum age bounds (following  
577 [Ellsworth et al. 1999](#), see [Nemer 2023](#)). For each synthetic sequence, a mean interevent time is calculated. We  
578 use 1000 synthetic sequences to produce a distribution for the mean interevent time. In Fig. 15, this distribution  
579 is superimposed to the rates of ruptures passing through the site, as forecasted by our preferred fault model ( $M_{\max}$   
580 7.9, entirely connected). [Daeron et al. \(2007\)](#) evaluated a characteristic coseismic slip of about 5.5m, which  
581 according to [Leonard \(2014\)](#) corresponds to an interval of magnitude 7.4 to 8 (extension of the grey box on the  
582 graphic). Accounting for the uncertainty on the paleoseismic rates, the observations in the trench are compatible  
583 with the forecasts resulting from both the 7.9 and 8.1 maximum magnitude assumptions.  
584

585 [Lefevre et al. \(2018\)](#) conducted a paleoseismological excavation at the Taybeh site, situated on the Wadi Araba  
586 fault, that reveals evidence for twelve surface-rupturing earthquakes spanning the last 8000 years. To build the  
587 distribution of mean inter-event times, we use the most complete and reliable part of this earthquake sequence,  
588 i.e. the period starting with the 31 BC earthquake that includes 5 earthquakes. To evaluate a magnitude range for  
589 these earthquakes, we use the rupture lengths obtained in [Lefevre et al. \(2018\)](#) by correlating the information at  
590 different trench sites (grey box in Figure 15). Our fault model forecasts less earthquakes than “observed” at the  
591 Taybeh site.  
592

593 We have compared the forecast to the data observed at two trench sites. A number of other trenches have been  
594 excavated along the Levant fault system (e.g. [Nemer & Meghraoui 2008](#), [Wechsler et al. 2014](#), [Sbeinati et al.](#)  
595 [2010](#)). For a complete evaluation, the forecast should be confronted against observations at all paleoseismic sites  
596 available. However, such a comparison is beyond the scope of the present manuscript, it should be considered in  
597 future developments of hazard models for the Levant fault system.  
598

599

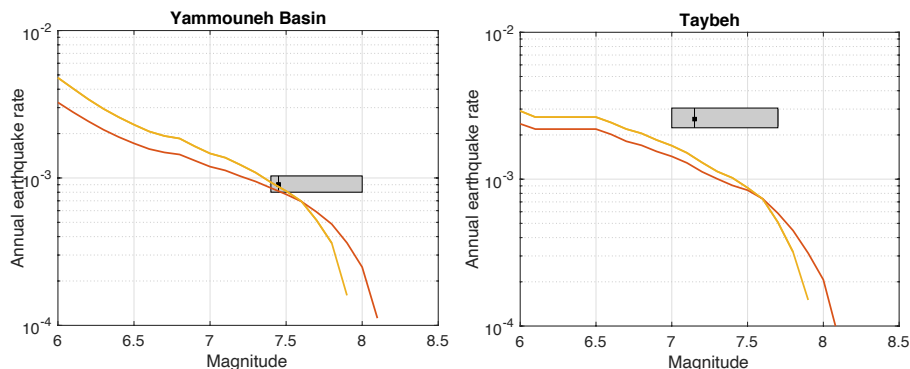

600

601 **Figure 15: Comparison of the earthquake forecast with rates of earthquakes based on paleoseismic data at two trench**  
602 **sites along the main strand of the LFS. Solid orange line: rates of ruptures passing through the site, as forecasted by**  
603 **the fault model built (also called “participation rates”), a fully interconnected model with  $M_{\max}$  7.9 for the**  
604 **Gutenberg-Richter system MFD. Dashed line: fully interconnected model with  $M_{\max}$  8.1 for the Gutenberg-Richter**  
605 **system MFD. Rectangle: distribution for the mean inter-event time between large earthquakes, inferred from the**  
606 **paleoseismic data, taking into account the uncertainty on the ages. Left: trench in Yammouneh Basin located along**  
607 **section S40; right: Taybeh trench site on section S8 on Wadi Araba fault (see Fig. 1b and Table 1).**  
608

607

608



## 609 7 Conclusions

610

611 The classical way of implementing faults in PSHA, considering separate faults that cannot interact with each  
612 other's, is not realistic. In the future, fault models in PSHA must account for complex ruptures, but there is no  
613 standard method yet. A few algorithms have been proposed to distribute the moment rate over the physically  
614 possible ruptures, SHERIFS (Chartier et al. 2017, 2019) is one of them. This algorithm is being increasingly used  
615 (e.g Gomez Novell et al. 2020; Cheng et al. 2021; Moratto et al. 2023, Harrichhausen et al., 2023), however none  
616 of the works published up to now analyze the distribution of seismic rates in magnitude and in space that controls  
617 hazard levels, nor analyze the results in light of the classical implementation of faults which represents the bulk  
618 of PSHA studies at present (both in research and in the industry). The aim of this manuscript is to address these  
619 issues.

620

621 We test different maximum magnitudes and different shapes for the frequency-magnitude distribution at the fault  
622 system level, as summarized in Table 2. We show how the algorithm distributes the seismic rates over the fault  
623 system, applying rules for defining which segments can break together. We demonstrate how some key decisions  
624 impact the seismic rates, such as the decision on the maximum magnitude the system can produce, or the  
625 maximum distance ruptures can jump between segments. The conversion of the slip rates into earthquakes is not  
626 straightforward, we display seismic rates maps that help understand the process. Our tests show that the seismic  
627 rates associated with a given segment depend strongly on the precise location of the segment within the fault  
628 system, and on the segment combinations it can be involved in. Hence, hazard levels are directly related to the  
629 implementation of the fault system, its segmentation, and the decision on which segments may break together. In  
630 the SHERIFS iterative process, magnitudes are sampled in a PDF at each iteration and associated to a combination  
631 of segments (with area matching the magnitude). At the scale of the system, the summed seismic rates follow a  
632 Gutenberg-Richter magnitude-frequency distribution (or another MFD shape). However, the set of ruptures and  
633 associated rates does not constitute a synthetic catalog (Chartier et al. 2019).

634

635 We perform a comparison of a classical fault model implementation with an interconnected fault model, in terms  
636 of the distribution in space of seismic rates for different magnitude levels, and in terms of seismic hazard levels.  
637 Both models are moment-balanced taking into account fault slip rates. We find that hazard levels may decrease  
638 or increase, with respect to the classical implementation, depending on the location of the segment within the  
639 system (main strand, secondary strand, segment combinations). For the Levant Fault System, hazard values at a  
640 475 yr return period on average decrease along the main strand (characterized by slip rate of ~4-5 mm/yr), and  
641 increase along the secondary faults (characterized by slip rate of the order of ~1-2 mm/yr). One main difference  
642 between the models is that the distribution in space of seismic rates is not homogeneous in the interconnected  
643 model, even for moderate magnitude earthquakes (M6). These moderate magnitude earthquakes control hazard  
644 levels at a 475 yr return period. We find highest hazard levels along segments with the highest seismic rates in the  
645 moderate magnitude range.

646

647 Among the fault models tested, our preferred model is based on a maximum magnitude 7.9 and a fully  
648 interconnected fault system. Five percent of the slip rate is not spent into earthquakes, which is a reasonable  
649 amount for aseismic creep along the Levant fault system. Combining this interconnected fault model with a set of  
650 ground-motion models valid for the region, hazard levels have been estimated. At a 475 years return period, we  
651 find PGA values larger than 0.2g over the entire country of Lebanon; and values larger than 0.3g within 20km of  
652 all fault segments considered (rock site conditions). At 0.2s, the spectral accelerations obtained are larger than  
653 0.6g over most of the Lebanon, with highest hazard around 1g for sites on the faults.

654

655

656

657

658



659 **Table 1** List of the faults, sections, and sub-sections, with corresponding dip, length and width, as well as mean  
 660 maximum magnitude (inferred from Leonard 2014), and slip rate estimates (see Figure 1). The scaling relationship  
 661 used is from Leonard 2014.

| Fault            | Section<br>(tectonic<br>segmentation,<br>see Fig. 1b) | Sub-section<br>(SHERIFS<br>segmentation,<br>see Fig. 1b) | Dip (°) | Length<br>(km) | Width<br>(km) | Mean<br>Slip rate<br>(mm/yr) | Mean<br>maximum<br>magnitude* |     |
|------------------|-------------------------------------------------------|----------------------------------------------------------|---------|----------------|---------------|------------------------------|-------------------------------|-----|
| Araba            | I                                                     | 5                                                        | 90      | 30.1           | 18            | 4.5                          | 6.7                           | 7.5 |
|                  | II                                                    | 6                                                        |         | 23             |               |                              | 6.6                           |     |
|                  | III                                                   | 7                                                        |         | 25.8           |               |                              | 6.6                           |     |
|                  | IV                                                    | 8                                                        |         | 22.9           |               |                              | 6.6                           |     |
|                  | V                                                     | 9                                                        |         | 10.4           |               |                              | 6.0                           |     |
|                  | VI                                                    | 10                                                       |         | 18.9           |               |                              | 6.5                           |     |
|                  | VII                                                   | 11                                                       |         | 22.4           |               |                              | 6.6                           |     |
|                  |                                                       |                                                          |         | 12             |               |                              | 21.9                          |     |
|                  | VIII                                                  | 1                                                        |         | 6.5            |               |                              | 5.6                           |     |
|                  | IX                                                    | 2                                                        |         | 5.3            |               |                              | 5.4                           |     |
|                  | X                                                     | 3                                                        |         | 4.3            |               |                              | 5.3                           |     |
| XI               | 4                                                     | 25.3                                                     | 6.6     |                |               |                              |                               |     |
| Jordan<br>Valley | I                                                     | 15                                                       | 90      | 33.7           | 18            | 4.5                          | 6.8                           | 7.5 |
|                  | II                                                    | 16                                                       |         | 25.2           |               |                              | 6.6                           |     |
|                  |                                                       | 17                                                       |         | 24.4           |               |                              | 6.6                           |     |
|                  | III                                                   | 18                                                       |         | 27.1           |               |                              | 6.7                           |     |
|                  | IV                                                    | 19                                                       |         | 13             |               |                              | 6.2                           |     |
|                  | V                                                     | 20                                                       |         | 28.1           |               |                              | 6.7                           |     |
|                  |                                                       | 21                                                       |         | 28.1           |               |                              | 6.7                           |     |
| Carmel<br>Gilboa | I                                                     | 46                                                       | 60      | 36.5           | 28            | 0.5                          | 6.8                           | 6.8 |
|                  | II                                                    | 47                                                       |         | 16.8           |               |                              | 6.4                           |     |
| Yammounch        | I                                                     | 13                                                       | 90      | 20.2           | 18            | 4.5                          | 6.5                           | 7.5 |
|                  | II                                                    | 39                                                       |         | 35.1           |               |                              | 6.8                           |     |
|                  |                                                       | 40                                                       |         | 34.2           |               |                              | 6.8                           |     |
|                  | III                                                   | 41                                                       |         | 32.8           |               |                              | 6.8                           |     |
|                  | IV                                                    | 42                                                       |         | 16.1           |               |                              | 6.4                           |     |
|                  | V                                                     | 43                                                       |         | 9.5            |               |                              | 5.9                           |     |
|                  | VI                                                    | 44                                                       |         | 11             |               |                              | 6.1                           |     |
| VII              | 45                                                    | 31.4                                                     | 6.7     |                |               |                              |                               |     |
| Rachaya          | I                                                     | 14                                                       | 90      | 19.7           | 18            | 1.4                          | 6.5                           | 7.1 |
|                  | II                                                    | 29                                                       |         | 24.8           |               |                              | 6.6                           |     |
|                  |                                                       | 30                                                       |         | 23.8           |               |                              | 6.6                           |     |
| Serghaya         | I                                                     | 36                                                       | 90      | 21             | 18            | 1.4                          | 6.6                           | 7.2 |
|                  | II                                                    | 37                                                       |         | 29.1           |               |                              | 6.7                           |     |
|                  | III                                                   | 38                                                       |         | 39.1           |               |                              | 6.8                           |     |
| Roum             | I                                                     | 31                                                       | 90      | 9.9            | 18            | 0.9                          | 6.0                           | 7   |



|                      |     |     |    |      |    |     |      |     |
|----------------------|-----|-----|----|------|----|-----|------|-----|
|                      | II  | 32  |    | 7.1  |    |     | 5.7  |     |
|                      | III | 33  |    | 6    |    |     | 5.5  |     |
|                      | IV  | 34  |    | 6.9  |    |     | 5.7  |     |
|                      | V   | 35  |    | 16   |    |     | 6.4  |     |
| <b>Mount Lebanon</b> | I   | 48  | 45 | 20.7 | 20 | 1.5 | 6.6  | 7.5 |
|                      | II  | 49  |    | 37.9 |    |     | 6.9  |     |
|                      |     | 50  |    | 37   |    |     | 6.9  |     |
|                      | III | 51  |    | 31.8 |    |     | 6.8  |     |
|                      |     | 52  |    | 30.5 |    |     | 6.8  |     |
| <b>Missyaf</b>       | I   | 22  | 90 | 21.4 | 18 | 2.2 | 6.6  | 7.3 |
|                      | II  | 23  |    | 29.7 |    |     | 6.7  |     |
|                      |     | III |    | 24   |    |     | 32.8 |     |
|                      | 25  |     |    | 32.4 |    |     | 6.7  |     |
| <b>Ghab</b>          | I   | 26  | 90 | 26   | 18 | 2.2 | 6.7  | 7   |
|                      |     | 27  |    | 25.9 |    |     | 6.7  |     |
|                      | II  | 28  |    | 27.7 |    |     | 6.7  |     |

662  
 663  
 664  
 665  
 666  
 667  
 668  
 669  
 670  
 671

\*Strike Slip: mean  $M_{\max} = \log_{10}(A) - 2.0087$  (area A in km<sup>2</sup>)

\*Reverse: mean  $M_{\max} = \log_{10}(A) - 2.0013$

**Table 2** Different parameterizations tested in the application of the SHERIFS algorithm on the Levant fault system. Seismogenic depth considered: 18km for the strike-slip segments (width of ruptures), 14km for segments on the Mount Lebanon Thrust. GR: Gutenberg Richter, YC: Youngs & Coppersmith. Slip rate increment (dsr) used: 0.0001 mm/yr.

| Model | Maximum jump distance | Reccurence model | $M_{\max}$ | Length of maximum rupture (km) | Number of rupture combinations | Unused slip rate (%) |
|-------|-----------------------|------------------|------------|--------------------------------|--------------------------------|----------------------|
| 1     | 10                    | GR               | 7.5        | 182                            | 532                            | 9                    |
| 2     | 10                    | GR               | 7.9        | 458                            | 3808                           | 64                   |
| 3     | 12                    | GR               | 7.9        | 460                            | 8452                           | 21                   |
| 4     | 18                    | GR               | 7.9        | 464                            | 18864                          | 5                    |
| 5     | 18                    | GR               | 8.1        | 732                            | 119327                         | 11                   |
| 6     | 18                    | YC               | 7.9        | 464                            | 18864                          | 14                   |

672  
 673  
 674  
 675  
 676  
 677  
 678  
 679  
 680  
 681



682 **Code and data availability**

683  
684 The python code used in this study was the version 1.3 from SHERIFS algorithm downloaded from the  
685 following website:  
686 <https://github.com/tomchartier/SHERIFS> (Last time accessed september 2024)  
687

688 **Author contribution**

689  
690 SEK, CB, MB, and YK designed the experiments and SEK carried them out. SEK and CB prepared the  
691 manuscript with contributions from all co-authors.  
692

693 **Competing interests**

694  
695 The authors declare that they have no conflict of interest.  
696

697 **Acknowledgements**

698  
699 This research benefited from the support of both the laboratory ISTerre, part of Labex OSUG@2020 (ANR10  
700 LABX56) in France, and the National Center of Geophysics in Lebanon. S. El Kadri benefitted from a SAFAR  
701 PhD scholarship financed by the French Embassy in Beirut and the Lebanese CNRS. Her stays in France were  
702 also supported by IRD through the ARTS PhD program. We are grateful to Francesco Visini and Martin Mai  
703 who read an earlier version of the manuscript and provided very useful feedbacks. We are also grateful to  
704 Océane Foix for her kind help in displaying some of the maps. At last, we would like to warmly thank Nicolas  
705 Harrichhausen for the fruitful discussions regarding SHERIFS implementation and for a careful proreading of  
706 the manuscript.  
707

708 **References**

- 709  
710 Akkar, S., M. A. Sandikkaya, and J. J. Bommer (2014). Empirical ground-motion models for point- and  
711 extended-source crustal earthquake scenarios in Europe and the Middle East, *Bull. Earthq. Eng.* 12, no. 1, 359–  
712 387. <https://doi.org/10.1007/s10518-013-9461-4>  
713  
714 Ambraseys, N. N., and Jackson, J. A. (1998). Faulting associated with historical and recent earthquakes in the  
715 Eastern Mediterranean region. *Geophysical Journal International*, 133(2), 390-406.  
716  
717 al Tarazi, E., J. Abu Rajab, F. Gomez, W. Cochran, R. Jaafar, and M. Ferry (2011), GPS measurements of near-  
718 field deformation along the southern Dead Sea Fault System, *Geochem. Geophys. Geosyst.*, 12, Q12021,  
719 doi:10.1029/2011GC003736  
720  
721 Brax M, Albin P, Beauval C, Jomaa R, Sursock A (2019) An earthquake catalog for the Lebanese region. *Seismol*  
722 *Res Lett* 90(6):2236-2249. <https://doi.org/10.1785/0220180292>  
723  
724 Chartier, T., Scotti, O., Lyon-Caen, H., & Boiselet, A. (2017). Methodology for earthquake rupture rate estimates  
725 of fault networks: Example for the western Corinth rift, Greece. *Natural Hazards and Earth System*  
726 *Sciences*, 17(10), 1857–1869. <https://doi.org/10.5194/nhess-17-1857-2017>.  
727  
728 Chartier T, Scotti O, Lyon-Caen H. (2019). SHERIFS: Open-source code for computing earthquake rates in fault  
729 systems and constructing hazard models. *Seismol Res Lett*, 90: 1678–1688  
730  
731 Cheng, J., Xu, X., Ren, J., Zhang, S., & Wu, X. (2021). Probabilistic multi-segment rupture seismic hazard  
732 along the Xiaojiang fault zone, southeastern Tibetan Plateau. *Journal of Asian Earth Sciences*, 221, 104940  
733  
734 Chiou, B. S. J., and Youngs, R. R. (2014). Update of the Chiou and Youngs NGA model for the average  
735 horizontal component of peak ground motion and response spectra. *Earthquake Spectra*, 30(3), 1117-1153.  
736  
737 Daeron M, Benedetti L, Tapponnier P, Sursock A, Finkel RC (2004) Constraints on the post~ 25-ka slip rate of  
738 the Yammouneh fault (Lebanon) using in situ cosmogenic <sup>36</sup>Cl dating of offset limestone clast fans. *Earth Planet*  
739 *Sci Lett* 227(1–2):105–119. <https://doi.org/10.1016/j.epsl.2004.07.014>  
740





- 741 Daëron, M. (2005), Rôle, cinématique et comportement sismique à long terme de la faille de Yammouneh, Thèse  
742 de doctorat, 178 pp., Inst. De Phys. du Globe de Paris, Paris.  
743
- 744 Daeron M, Klinger Y, Tapponnier P, Elias A, Jacques E, Surssock A (2005) Sources of the large AD 1202 and  
745 1759 Near East earthquakes. *Geology* 33(7):529–532. <https://doi.org/10.1130/G21352.1>  
746
- 747 Daeron M, Klinger Y, Tapponnier P, Elias A, Jacques E, Surssock A (2007) 12,000-year-long record of 10 to 13  
748 paleoearthquakes on the Yammouneh fault, Levant fault system, Lebanon. *Bull Seismol Soc Am* 97(3):749–771.  
749 <https://doi.org/10.1785/0120060106>  
750
- 751 Danciu, L., Giardini, D., Weatherill, G., Basili, R., Nandan, S., Rovida, A., Beauval, C., Bard, P.-Y., Pagani, M.,  
752 Reyes, C. G., Sesetyan, K., Vilanova, S., Cotton, F., and Wiemer, S. (2024): The 2020 European Seismic Hazard  
753 Model: Overview and Results, in press in NHESS, <https://doi.org/10.5194/egusphere-2023-3062>  
754
- 755 Eberhart-Phillips, D., P. J. Haeussler, J. T. Freymueller, A. D. Franckel, C. M. Rubin, P. Craw, N. A. Ratchkovski,  
756 G. Anderson, G. A. Carver, A. J. Crone, T. E. Dawson, H. Fletcher, R. Hansen, E. L. Harp, R. A. Harris, D. P.  
757 Hill, S. Hreinsdottir, R. W. Jibson, L. M. Jones, R. Kayen, D. K. Keefer, C. F. Larsen, S. C. Moran, S. F.  
758 Personius, G. Plafker, B. Sherrod, K. Sieh, N. Sitar, and W. K. Wallace (2003). The 2002 Denali fault earthquake,  
759 Alaska: a large magnitude, slip-partitioned event, *Science* 300, 1113–1118.  
760
- 761 Elias, A., P. Tapponnier, S. C. Singh, G. C. P. King, A. Briaais, M. Daëron, H. Carton, A. Surssock, E. Jacques, R.  
762 Jomaa, and Y. Klinger (2007), Active thrusting offshore Mount Lebanon: Source of the tsunamigenic A.D. 551  
763 Beirut-Tripoli earthquake, *Geology*, 35, 755–758, doi:10.1130/G2363A.  
764
- 765 El Kadri, S., Beauval, C., Brax, M., Bard, P. Y., Vergnolle, M., & Klinger, Y. (2023). A fault-based probabilistic  
766 seismic hazard model for Lebanon, controlling parameters and hazard levels. *Bulletin of Earthquake Engineering*,  
767 21(7), 3163-3197. <https://doi.org/10.1007/s10518-023-01631-z>  
768
- 769 Ekström, G., Nettles, M., & Dziewoński, A. M. (2012). The global CMT project 2004–2010: Centroid-moment  
770 tensors for 13,017 earthquakes. *Physics of the Earth and Planetary Interiors*, 200, 1-9.  
771
- 772 Ellsworth, W. L., Matthews, M. V., Nadeau, R. M., Nishenko, S. P., Reasenberg, P. A., & Simpson, R. A.  
773 (1999). A physically-based earthquake recurrence model for estimation of long-term earthquake probabilities.  
774 Workshop on earthquake recurrence: state of the art and directions for the future, Istituto Nazionale de  
775 Geofisica, Rome, Italy, 22-25 February, 1999, proceeding, 22pp.  
776
- 777 Ferry M, Meghraoui M, Abou Karaki N, Al-Taj M, Khalil L (2011) Episodic behavior of the Jordan Valley section  
778 of the Dead Sea fault inferred from a 14-ka-long integrated catalog of large earthquakes episodic behavior of the  
779 Jordan Valley section of the Dead Sea fault. *Bull Seismol Soc Am* 101(1):39–67.  
780 <https://doi.org/10.1785/0120100097>  
781
- 782 Field, E. H., Arrowsmith, R. J., Biasi, G. P., Bird, P., Dawson, T. E., Felzer, K. R., Jackson, D. D., Johnson, K.  
783 M., Jordan, T. H., Madden, C., Michael, A. J., Milner, K. R., Page, M. T., Parsons, T., Powers, P. M., Shaw, B.  
784 E., Thatcher, W. R., Weldon, R. J., Zeng, Y., (2014). Uniform California earthquake rupture forecast, version 3  
785 (UCERF3)—The time-independent model. *Bulletin of the Seismological Society of America*, 104(3), 1122-1180.  
786 doi: <https://doi.org/10.1785/0120130164>  
787
- 788 Fletcher, J., Teran, O. J., Rockwell, T. K., Oskin, M. E., Hudnut, K. W., Mueller, K. J., et al. (2014). Assembly  
789 of a large earthquake from a complex fault system: Surface rupture kinematics of the 4 April 2010 El Mayor-  
790 Cucupah (Mexico)  $M_w$  7.2 earthquake. *Geosphere*, 10, 797–827. <https://doi.org/10.1130/ges00933.1>  
791
- 792 Geist, E. L., & ten Brink, U. S. (2021). Earthquake magnitude distributions on northern Caribbean faults from  
793 combinatorial optimization models. *Journal of Geophysical Research: Solid Earth*, 126(10), e2021JB022050.  
794
- 795 Gomez, F., M. Meghraoui, A. N. Darkal, F. Hijazi, M. Mouty, Y. Suleiman, R. Sbeinati, R. Darawcheh, R. Al-  
796 Ghazzi, and M. Barazangi (2003), Holocene faulting and earthquake recurrence along the Serghaya branch of the  
797 Dead Sea fault system in Syria and Lebanon, *Geophys. J. Int.*, 153, 658–674, <https://doi.org/10.1046/j.1365-246X.2003.01933.x>  
798  
799



- 800 Gomez, F., G. Karam, M. Khawlie, S. McClusky, P. Vernant, R. Reilinger, R. Jaafar, C. Tabet, K. Khair, and M.  
801 Barazangi (2007a), Global Positioning System measurements of strain accumulation and slip transfer through the  
802 restraining bend along the Dead Sea fault system in Lebanon, *Geophys. J. Int.*, 168(3), 1021–1028,  
803 doi:[10.1111/j.1365-246X.2006.03328.x](https://doi.org/10.1111/j.1365-246X.2006.03328.x).  
804  
805 Gomez, F., Nemer, T., Tabet, C., Khawlie, M., Meghraoui, M., & Barazangi, M. (2007b). Strain partitioning of  
806 active transpression within the Lebanese restraining bend of the Dead Sea Fault (Lebanon and SW Syria).  
807 *Geological Society, London, Special Publications*, 290(1), 285-303.  
808  
809 Gómez-Novell O, García-Mayordomo J, Ortuño M, Masana E and Chartier T (2020) Fault System-Based  
810 Probabilistic Seismic Hazard Assessment of a Moderate Seismicity Region: The Eastern Betics Shear Zone (SE  
811 Spain). *Front. Earth Sci.* 8:579398. doi: 10.3389/feart.2020.579398  
812  
813 Gupta, A., & Scholz, C. H. (2000). A model of normal fault interaction based on observations and theory. *Journal*  
814 *of structural Geology*, 22(7), 865-879.  
815  
816 Hamling, I. J., Hreinsdóttir, S., Clark, K., Elliott, J., Liang, C., Fielding, E., Litchfield N., Villamor P., Wallace  
817 L., Wright T.J., D'Anastasio E., Bannister S., Burbridge D., Denys P., Gentle P., Howarth J., Mueller C., Palmer  
818 N., Pearson C., Power W., Barnes P., Barrell D., Van Dissen R., Langridge R., Little T., Nicol A., Pettinga J.,  
819 Rowland J. & Stirling, M. (2017). Complex multifault rupture during the 2016 M<sub>w</sub> 7.8 Kaikōura earthquake,  
820 New Zealand. *Science*, 356(6334), eaam7194.  
821  
822 Harrichhausen, N., Audin, L., Baize, S., Johnson, K. L., Beauval, C., Jarrin, P., Marconato, L., Rolandone,  
823 F., Jomard, H., Nocquet, J.-M., Alvarado, A., Mothes, P.A. (2024). Fault source models show slip rates measured  
824 across the width of the entire fault zone best represent the observed seismicity of the Pallatanga–Puna Fault,  
825 Ecuador. *Seismological Research Letters*, 95(1), 95-112.  
826  
827 Harris, R. A., & Day, S. M. (1993). Dynamics of fault interaction: Parallel strike-slip faults. *Journal of*  
828 *Geophysical Research: Solid Earth*, 98(B3), 4461-4472.  
829  
830 Klinger, Y., Xu, X., Tapponnier, P., Van der Woerd, J., Lasserre, C., & King, G. (2005). High-resolution satellite  
831 imagery mapping of the surface rupture and slip distribution of the M<sub>w</sub> ~ 7.8, 14 November 2001 Kokoxili  
832 earthquake, Kunlun fault, northern Tibet, China. *Bulletin of the Seismological Society of America*, 95(5), 1970-  
833 1987.  
834  
835 Klinger, Y., Le Béon, M., & Al-Qaryouti, M. (2015). 5000 yr of paleoseismicity along the southern Dead Sea  
836 fault. *Geophysical Journal International*, 202(1), 313-327.  
837  
838 Klinger, Y., Okubo, K., Vallage, A., Champenois, J., Delorme, A., Rougier, E., Lei, Z., Knight, E. E., Munjiza,  
839 A., Satriano, C., Baize, S., Langridge, R., & Bhat, H. S. (2018). Earthquake damage patterns resolve complex  
840 rupture processes. *Geophysical Research Letters*, 45, 10,279–210,287. <https://doi.org/10.1029/2018GL078842>  
841  
842 Kotha SR, Weatherill G, Bindi D, Cotton F (2020) A regionally-adaptable ground-motion model for  
843 shallow crustal earthquakes in Europe. *Bull Earthq Eng* 18(9):4091–4125. [https://doi.org/10.1007/s10518-020-](https://doi.org/10.1007/s10518-020-00869-1)  
844 [00869-1](https://doi.org/10.1007/s10518-020-00869-1)  
845  
846 Lefevre, M., Klinger, Y., Al-Qaryouti, M., Le Béon, M., & Moumani, K. (2018). Slip deficit and temporal  
847 clustering along the Dead Sea fault from paleoseismological investigations. *Scientific reports*, 8(1), 4511.  
848  
849 Leonard M (2014) Self-consistent earthquake fault-scaling relations: update and extension to stable continental  
850 strike-slip faults. *Bull Seismol Soc Am* 104(6):2953–2965. <https://doi.org/10.1785/0120140087>  
851  
852 Lolli, B., P. Gasperini, and G. Vannucci (2014). Empirical conversion between teleseismic magnitudes (mb and  
853 Ms) and moment magnitude (M<sub>w</sub>) at the Global, Euro-Mediterranean and Italian scale, *Geophys. J. Int.* 199,  
854 805–828.  
855  
856 Lu, Y., Wetzler, N., Waldmann, N., Agnon, A., Biasi, G. P., & Marco, S. (2020). A 220,000-year-long continuous  
857 large earthquake record on a slow-slipping plate boundary. *Science Advances*, 6(48), eaba4170.  
858



- 859 Meghraoui M, Gomez F, Sbeinati R et al. (2003) Evidence for 830 years of seismic quiescence from  
860 palaeoseismology, archaeoseismology and historical seismicity along the Dead Sea fault in Syria. *Earth Planet*  
861 *Sci Lett* 210(1–2):35–52. [https://doi.org/10.1016/S0012-821X\(03\)00144-4](https://doi.org/10.1016/S0012-821X(03)00144-4)  
862
- 863 Meghraoui, M. (2015). Paleoseismic history of the Dead Sea fault zone, In: Beer, M., Kougioumtzoglou, I., Patelli,  
864 E., Au, IK. (eds) *Encyclopedia of Earthquake Engineering*. Springer, Berlin, Heidelberg.  
865 [https://doi.org/10.1007/978-3-642-36197-5\\_40-1](https://doi.org/10.1007/978-3-642-36197-5_40-1)  
866
- 867 Meletti C, Marzocchi W, D’Amico V, Lanzano G, Luzi L, Martinelli F, Pace B, Rovida A, Taroni M, Visini F  
868 (2021) The new Italian seismic hazard model (MPS19). *Ann Geophys* 64(1):SE112. [https://doi.org/10.4401/ag-](https://doi.org/10.4401/ag-8579)  
869 [8579](https://doi.org/10.4401/ag-8579)  
870
- 871 Moratto, L., Santulin, M., Tamaro, A., Saraò, A., Vuan, A., & Rebez, A. (2023). Near-source ground motion  
872 estimation for assessing the seismic hazard of critical facilities in central Italy. *Bulletin of Earthquake*  
873 *Engineering*, 21(1), 53–75, <https://doi.org/10.1007/s10518-022-01555-0>.  
874
- 875 Nemer, B. (2023). Time-dependent models for on-fault earthquakes in a PSHA study, Grenoble Alp University,  
876 Master in Natural Hazards in Civil Engineerings, internship report, 31p.  
877
- 878 Nemer T, Meghraoui M (2006) Evidence of coseismic ruptures along the Roum fault (Lebanon): a possible  
879 source for the AD 1837 earthquake. *J Struct Geol* 28(8):1483–1495. <https://doi.org/10.1016/j.jsg.2006.03.038>  
880
- 881 Nemer T, Meghraoui M, Khair K (2008) The Rachaya-Serghaya fault system (Lebanon): evidence of  
882 coseismic ruptures, and the AD 1759 earthquake sequence. *J Geophys Res: Solid Earth* 113(5):1–  
883 12. <https://doi.org/10.1029/2007JB005090>  
884
- 885 Nemer, T., Gomez, F., Al Haddad, S., & Tabet, C. (2008). Coseismic growth of sedimentary basins along the  
886 Yammouneh strike-slip fault (Lebanon). *Geophysical Journal International*, 175(3), 1023–1039.  
887 <https://doi.org/10.1111/j.1365-246X.2008.03889.x>  
888
- 889 Pagani M, Monelli D, Weatherill G et al. (2014) OpenQuake-engine: an open hazard (and risk) software for the  
890 global earthquake model. *Seismol Res Lett* 85(3):692–702. <https://doi.org/10.1785/0220130087>  
891
- 892 Page, M. T., Field, E. H., Milner, K. R., & Powers, P. M. (2014). The UCERF3 grand inversion: Solving for the  
893 long-term rate of ruptures in a fault system. *Bulletin of the Seismological Society of America*, 104(3), 1181–1204.  
894
- 895 Sbeinati MR, Meghraoui M, Suleyman G, Gomez F, Grootes P, Nadeau M, Al Najjar H, Al-Ghazzi R (2010)  
896 Timing of earthquake ruptures at the Al Harif Roman Aqueduct (Dead Sea fault, Syria) from archeoseismology  
897 and paleoseismology, Special volume “Archaeoseismology and paleoseismology. In: Sintubin M, Stewart IS,  
898 Niemi TM, Altunel E (eds) *Ancient earthquakes: geological society of America special paper*, 471.  
899 doi:10.1130/2010.2471(20)  
900
- 901 Scholz, C. H., & Gupta, A. (2000). Fault interactions and seismic hazard. *Journal of Geodynamics*, 29(3–5),  
902 459–467.  
903
- 904 Sesetyan, K., Demircioglu, M. B., Duman, T. Y., Çan, T., Tekin, S., Azak, T. E., & Fercan, Ö. Z. (2018). A  
905 probabilistic seismic hazard assessment for the Turkish territory—part I: the area source model. *Bulletin of*  
906 *Earthquake Engineering*, 16, 3367–3397.  
907
- 908 Storchak, D. A., Di Giacomo, E. R., Engdahl, J. Harris, I. Bondár, W. H. K. Lee, P. Bormann, and A. Villaseñor  
909 (2015). The ISC-GEM Global Instrumental Earthquake Catalog (1900–2009): Introduction, *Phys. Earth Planet.*  
910 *In.* 239, 48–63, doi:10.1016/j.pepi.2014.06.009.  
911
- 912 Storchak, D. A., Harris, J., Brown, L., Lieser, K., Shumba, B., & Di Giacomo, D. (2020). Rebuild of the Bulletin  
913 of the International Seismological Centre (ISC)—part 2: 1980–2010. *Geoscience Letters*, 7(1), 1–21.  
914
- 915 Visini, F., Valentini, A., Chartier, T., Scotti, O., & Pace, B. (2020). Computational tools for relaxing the fault  
916 segmentation in probabilistic seismic hazard modelling in complex fault systems. *Pure and Applied Geophysics*,  
917 177, 1855–1877.  
918



- 919 Wang, Y. J., Chan, C. H., Lee, Y. T., Ma, K. F., Shyu, J. B. H., Rau, R. J., & Cheng, C. T. (2016). Probabilistic  
920 seismic hazard assessment for Taiwan. *Terr. Atmos. Ocean. Sci.*, 27(3), 325-340.  
921  
922 Wechsler N, Rockwell TK, Klinger Y, Štěpančíková P, Kanari M, Marco S, Agnon A (2014) A paleoseismic  
923 record of earthquakes for the Dead Sea transform fault between the first and seventh centuries CE: nonperiodic  
924 behavior of a plate boundary fault. *Bull Seismol Soc Am* 104(3):1329–1347. <https://doi.org/10.1785/0120130304>  
925  
926  
927 Wechsler, N., Rockwell, T. K., & Klinger, Y. (2018). Variable slip-rate and slip-per-event on a plate boundary  
928 fault: The Dead Sea fault in northern Israel. *Tectonophysics*, 722, 210-226.  
929  
930 Wesnousky, S. G. (2006). Predicting the endpoints of earthquake ruptures. *Nature*, 444(7117), 358-360.  
931  
932 Yeats, R. S.; Sieh, K. E.; Allen, C. R. 1997: The geology of earthquakes. New York, Oxford University Press.  
933 568 p.  
934  
935 Youngs, R. R., & Coppersmith, K. J. (1985). Implications of fault slip rates and earthquake recurrence models to  
936 probabilistic seismic hazard estimates. *Bulletin of the Seismological society of America*, 75(4), 939-964.  
937  
938 Zare M, Amini H, Yazdi P, Sesetyan K, Demircioglu MB, Kalafat D, Erdik M, Giardini D, Khan MA, Tsereteli  
939 N (2014) Recent developments of the Middle East catalog. *Journal of Seismology* 18: 749–772.  
940  
941 Zhang, Y., Tang, X., Liu, D., Taymaz, T., Eken, T., Guo, R., Zheng, Y., Wang, J., and Sun, H (2023). Geometric  
942 controls on cascading rupture of the 2023 Kahramanmaraş earthquake doublet. *Nature Geoscience*,  
943 [doi:10.1038/s41561-023-01283-3](https://doi.org/10.1038/s41561-023-01283-3)  
944  
945  
946  
947  
948
